# Supplementary material for: Retraction: Nimtaj, A., and Bagheripour, M. (2013). “An Applied Method for Analysis of Nonlinear Seismic Response of Layered Soil Deposit.” Int. J. Geomech. , 10.1061/(ASCE)GM.1943-5622.0000364 (Sep. 25, 2013)
Source: Atypon-hosted journal article supplement (doi:10.1061/(asce)gm.1943-5622.0000691), 2016-04-09
Supplement: retracted_manuscript_gm.1943-5622.0000364.pdf [file retracted_manuscript_gm.1943-5622.0000364.pdf]

# An applied method for analysis of nonlinear seismic response of layered soil deposit

Amir Nimitaj<sup>1</sup> and Mohammad Hossein Bagheripour<sup>2</sup>

**Abstract.** The available methods of Seismic ground response analysis including equivalent linear and nonlinear methods perform the analysis in the time or frequency domain. Nonlinear methods usually provide accurate results however, these methods are usually time-consuming because of their step by step integration procedure in time domain. On the other hand, simplicity, flexibility and less computational effort are the advantages of the frequency domain methods. Therefore, in this paper seismic response of layered soil deposits is performed by hybrid frequency-time domain procedure. The soil deposit is modeled as a discrete system composed of a finite number of lumped masses connected by springs and dashpots. A seismic motion is applied to the system at the base level. Pseudo-forces are applied to the system in a rational iterative procedure in the time domain to evaluate the nonlinear soil behavior. This paper presents an applied method of the nonlinear seismic ground response analysis without the need for more input data than general data provided in the most of the geotechnical investigations. Verification of the accuracy of the proposed method is made by comparing its results including acceleration and displacement time histories and acceleration response spectrum to the recorded data of different earthquakes. Further investigation is conducted by comparing the results of the proposed method with the results of equivalent linear (i.e. SHAKE computer program) and nonlinear (i.e. DEEPSOIL computer program) methods.

**Keywords:** Soil dynamics; Seismic analysis; Nonlinear analysis; Damping; Hybrid method; Earthquake response analysis

## Introduction

Seismic response analysis of soil deposits is a part of geotechnical earthquake engineering which deal with the site effects on the propagated seismic wave in the ground. Among the most important factors

---

<sup>1</sup> M.Sc., Dept. of Civil Engineering, Kerman University, Iran.

<sup>2</sup> Associate professor, Dept. of Civil Engineering, Kerman University, Iran.

25 involved in the site effects, local geologic conditions, topography, soil layering and geotechnical  
26 properties of soil to the depth of 50 m could be noted (Aki, 1988, Faccioli, 1991). Seismic ground  
27 response analyses provide researchers with important results including design response spectrum,  
28 liquefaction susceptibility estimation and seismic slope stability assessment (Kramer, 1996).  
29 Generally, methods of predicting the ground seismic response could be divided into empirical and  
30 analytical categories. Among the empirical methods, empirical equations (Day, 2002), microtremors  
31 (Diagourtas, et al., 2001) and spectral ratio analysis (Heisey, 1982) could be mentioned. On the other  
32 hand, some researchers demonstrated that differences between characteristics of bedrock excitation  
33 and soil deposit movement during an earthquake could be analyzed and predicted (Wiggins, 1964).  
34 Analytical methods are mainly categorized into linear, equivalent linear and nonlinear methods. These  
35 methods differ in their modeling of soil behavior under earthquake loading. Available methods of the  
36 seismic ground response analysis can also be categorized in terms of their calculation domain. Based  
37 on this aspect, these methods are categorized into time and frequency domain methods. In this  
38 classification, the equivalent linear procedure is among the frequency domain methods and most of  
39 nonlinear methods are among the time domain methods.

40

#### 41 **Available methods of seismic ground response analysis**

42

43 Nowadays, the non-linear behavior of soils under cyclic loading is well known. The equivalent linear  
44 method is one of the available ones to estimate the nonlinear behavior of soil. Seed and Idriss (1970)  
45 used this method for the first time in geotechnical earthquake engineering. Afterwards, other  
46 researchers tried to complete their computational procedure (Assimaki and Kausel, 2002, Yoshida, et  
47 al., 2002). Based on dynamic characteristics of the soil, including shear modulus and damping ratio,  
48 this method calculates transfer functions to perform seismic ground response analysis. Then, the  
49 mentioned soil dynamic characteristics are re-estimated according to the shear modulus degradation  
50 and damping ratio curves. These curves are provided by laboratory tests. Many researchers have  
51 offered these curves for various types of soil (Seed, et al., 1984, Seed and Idriss, 1970, Sun, et al.,  
52 1988). Based on the re-estimated dynamic characteristics of the soil, calculations are repeated. This

53 process is continued until the error becomes less than a previously considered value. SHAKE  
54 (Schnabel, et al., 1972) is among the first computer programs presented to analyze the seismic ground  
55 response. This program implements the equivalent linear procedure to perform one-dimensional  
56 ground response analysis for soil deposits that idealized as horizontally stratified, viscoelastic medium  
57 (Idriss and Sun, 2001, Idriss and Sun, 1992). EERA (Bardet, et al., 2000) is another program which  
58 also using the equivalent linear procedure to perform seismic ground response analysis.

59 Nonlinear seismic ground response analysis methods are composed of a solution scheme for the wave  
60 equation and the constitutive model as their two main components. Finite element and finite difference  
61 methods could be mentioned among the solution schemes (Wood, 2004). These methods are used in  
62 forming required equations for integration in the small time steps. It is noteworthy, these two methods  
63 have developed for their part which have led to completion of their computational procedure  
64 (Bagheripour and Zhao, 1992, Chuhan and Zhao, 1987, Von Estorff and Firuziaan, 2000). The  
65 constitutive models are applied to estimate the nonlinear soil behavior under cyclic loadings. These  
66 constitutive models are based on laboratory test results. Hyperbolic (Hardin and Drnevich, 1972),  
67 Ramberg-Osgood (Ramberg and Osgood, 1943), Davidenkov (Pyke, 1979), Prevost (Prevost, 1977)  
68 and Iwan (Iwan, 1967) models could be mentioned among these models. Hyperbolic model has been  
69 used more than others. This model, is often used with Masing (Masing, 1926) and Modified Masing  
70 (Pyke, 1979) criteria to model the soil hysteresis behavior. Lee and Finn (1978) and Matasovic (1993)  
71 used this technique to analyze the nonlinear soil response under cyclic loadings. These researchers  
72 used Wilson  $\theta$  (Wilson, 1968) and Newmark  $\beta$  (Chopra, 1995) numerical methods, respectively in  
73 their computational process. Hashash and Park (2001, 2002) and Phillips and Hashash (2009) also  
74 used the hyperbolic model and Newmark  $\beta$  method to solve the equation of motion in the time domain.

75 Based on their proposed method, latter researchers presented DEEPSOIL computer program (Hashash,  
76 et al., 2011). Streeter et al. (1974) implemented Ramberg-Osgood model alongside Masing criteria to  
77 analyze the stratified soil deposits. Martin and Seed (1978), used Davidenkov model and finite  
78 element method to perform one-dimensional seismic soil response analysis. Some researchers,  
79 including Elgamal et al. (1998) and Prevost (1989) implemented more sophisticated constitutive  
80 models of porous media to predict soil behavior under the earthquake loading. Using more

81 sophisticated constitutive models offers more accurate results and provides more realistic predictions  
82 of soil behavior under earthquake loading such as liquefaction, dilation and excess pore water  
83 pressure. However, due to the complexity of implementation of these models and calibration of their  
84 required parameters, these constitutive models are always faced difficulties for practical  
85 considerations (Lo Presti, et al., 2006).

86 Few downhole vertical array data has led to uncertainty about the appropriate method of analysis of  
87 the vertical seismic response of the ground. Although the common assumptions of one-dimensional  
88 ground response analysis are very common, however in some cases two or three dimensional seismic  
89 analysis is necessary. Slope ground, heavy and rigid buried structures are among these issues (Kramer,  
90 1996). Many researchers have also analyzed the three-dimensional response of the ground under  
91 dynamic loads while most of them have used the finite element method (Kim and Roesset, 2004,  
92 Maheshwari, et al., 2005, Zamani and Shamy, 2012). Detailed explanation of multidimensional  
93 analyses is beyond the scope of this paper however, Ferrini (2001), Lo Presti and Ferrini (2002) are  
94 compared these methods in detail.

95 Some researchers tried to combine frequency and time domain methods to benefit from the advantages  
96 of both methods. Kawamoto (1983) proposed Hybrid frequency-time domain (HFTD) procedure for  
97 the first time to solve structural dynamics problems. In his proposed method, he solved the equation of  
98 motion in the frequency domain while nonlinear effects due to cyclic loading are applied to the system  
99 by pseudo-forces in the time domain. Thenceforth, other researchers began to complete and implement  
100 his proposed method (Darbre and Wolf, 1988). Wolf (1986) implemented the HFTD procedure to  
101 analyze nonlinear soil-structure interaction problems. After him, other researchers considered the  
102 various aspects of his work and improved it for use in soil-structure interaction problems (Bernal and  
103 Youssef, 1998, Ding and Liao, 2001). Mansur et al. (2000) used the HFTD procedure to solve multi-  
104 degree of freedom nonlinear structural problems under time-dependent loadings. They segmented the  
105 applied load into smaller time intervals to increase the accuracy of their calculations. In recent years,  
106 efforts have been made to implement the hybrid frequency-time domain procedure in the soil  
107 dynamics problems, including nonlinear analysis of seismic ground response. One-dimensional

108 nonlinear seismic response analysis of a single layer soil deposit is among these efforts (Asgari and  
109 Bagheripour, 2010). In another study, the nonlinear response of the soil deposits analyzed using  
110 dynamic stiffness matrix to prevent recursive calculation (Bazrafshan moghaddam and Bagheripour,  
111 2011). In the mentioned study, nonlinear soil behavior is modeled by implementation of the HFTD  
112 procedure.

113 In this paper, a hybrid frequency-time domain (HFTD) approach has been implemented to analyze the  
114 nonlinear seismic response of a multi layered soil deposit. Calculations are performed in a tangible and  
115 comprehensible way without the use of matrix operation techniques. In order to verify the accuracy of  
116 the results of the proposed method, the obtained results including time histories of acceleration,  
117 displacement and acceleration response spectra are compared to the recorded data of real earthquakes.  
118 The results of the proposed method are also compared to similar results obtained from the equivalent  
119 linear (i.e. SHAKE) and nonlinear time domain (i.e. DEEPSOIL) methods.

120

### 121 **The proposed method**

122

123 Analyzing the dynamic equation of motion by the numerical integration methods in the time domain  
124 have been used by many researchers. On the other hand, in some problems the frequency domain is  
125 preferred to the time domain for analyzing the problems. The main advantages of the frequency  
126 domain analyses to the time domain ones are their significant reduction in the calculation efforts,  
127 simplicity and flexibility. Providing the frequency content of the loadings and calculation of response  
128 spectra of the earthquake characteristics such as acceleration are the other advantages of the frequency  
129 domain methods (Clough and Penzien 1993, Paz, 1997). The basic shortcoming of the frequency  
130 domain methods is their inherent linear aspect of their calculations. These methods are not able to  
131 calculate the nonlinear behavior of the systems and just estimate it (Lo Presti, et al., 2006). Therefore,  
132 many researchers choose to analyze the nonlinear systems in the time domain, however in  
133 geotechnical systems, it involves difficulties because of practical considerations. In many cases the  
134 required parameters of these procedures are not recorded accurately in the reports and the obtaining  
135 process is usually expensive and time-consuming (Bazrafshan moghaddam and Bagheripour, 2011).

136 Another important advantage of the frequency domain methods is implementation of superposition  
137 principle in their calculation procedure. Various frequency components of the loading could be  
138 decomposed by using this principle. This is used in the calculation and investigation of response  
139 spectra. In the frequency domain analyses, earthquake loading could be assigned at any arbitrary level  
140 of the system while the response could be analyzed for any level. This could be mentioned as another  
141 advantage of the frequency domain methods since in the time domain methods, seismic loading should  
142 be assigned at the base level. As an important result, deconvolution process could be named which  
143 helps to estimate a unique input motion at the base level based on the observed seismic motion at the  
144 surface. It is important to remember, different input motion can be perceived for an observed motion at  
145 the surface in time domain methods (Kramer, 1996). Regarding these advantages, in the current study  
146 equation of motion is solved in the frequency domain so above advantages can also be considered as  
147 the advantages of the proposed method. Besides, in the current study the needed parameters to  
148 evaluate the nonlinear behavior of the soil under cyclic loadings are obtained from the shear modulus  
149 reduction and damping ratio curves provided by laboratory tests. In this paper, nonlinear behavior of  
150 the soil is considered by applying pseudo-forces calculated in time domain. Thus, in addition to  
151 benefiting from the frequency domain advantages, nonlinear soil behavior is considered in the time  
152 domain.

153

#### 154 *Soil deposit modeling*

155

156 In this study, horizontally stratified soil deposit is modeled as a one-dimensional discrete system  
157 consists of a finite number of lumped masses which are connected by springs and dashpots. As shown  
158 in figure 1, a multi-layer soil column is modeled as a multi degree of freedom lumped mass system. In  
159 order to calculate the corresponding lumped mass of each layer, the following equation can be used  
160 (Ohsaki, 1982):

$$161 \quad m_z = \rho_z h_z \quad , z=1, 2, 3, \dots, Z \quad (1)$$

162 where  $z$  is the layer number,  $Z$  is the number of layers in the soil deposit,  $\rho$ ,  $h$  and  $m$  are density,

163 thickness and lumped mass of each soil layer, respectively. Stiffness of the springs is computed as  
 164 (Ohsaki, 1982):

$$165 \quad k_z = G_z/h_z \quad , z=1, 2, 3, \dots, Z \quad (2)$$

166 where  $k$  is the spring stiffness and  $G$  is the shear modulus. After a soil column is modeled, the bedrock  
 167 behavior should be considered. Bedrock can be assumed to be rigid or elastic. If the earthquake is  
 168 recorded within the soil column (e.g. vertical array), rigid bedrock is a more appropriate option  
 169 (Kwok, et al., 2007) because the rigid bedrock reflects all the downward seismic waves. In other  
 170 words, the bedrock motion is not affected by the movement of the overlying soil deposit. On the other  
 171 hand, if the earthquake is recorded on an outcrop, elastic bedrock provides a better model for the  
 172 situation, because some downward seismic waves are dissipated by the bedrock. In this case, a damper  
 173 is used to connect the bedrock to soil deposit (Hashash and Park, 2001):

$$174 \quad c_r = \rho_r v_r \quad (3)$$

175 where  $c_r$  is damping,  $\rho_r$  and  $v_r$  are density and velocity of seismic wave in the bedrock.

177 *Equation of motion in frequency domain*

179 Equation of motion for multi layer soil deposit is written in time domain as:

$$180 \quad m_z \ddot{U}_z(t) + c_z \dot{U}_z(t) + k_z U_z(t) = F(t) \quad (4)$$

181 where  $m$  is mass,  $c$  is damping,  $k$  is stiffness and  $U_z(t)$ ,  $\dot{U}_z(t)$ ,  $\ddot{U}_z(t)$  are displacement, velocity and  
 182 acceleration, respectively. The index  $z$  is soil layer number as aforementioned. In the above equation  
 183  $F(t)$  is the harmonic load applied to the system and written as:

$$184 \quad F(t) = fe^{i\omega t} \quad (5)$$

185 where  $f$  is the harmonic load amplitude,  $t$  and  $\omega$  are time and angular frequency, respectively. Thus, a  
 186 harmonic displacement occurs due to this harmonic load, expressed as (Kramer, 1996):

$$187 \quad U_z(t) = u_z e^{i\omega t} \quad (6)$$

188 where  $u_z$  is the amplitude of the harmonic displacement. By derivation with respect to time of the

189 equation (6), one can write:

$$190 \quad \frac{dU_z(t)}{dt} = u_z i \omega e^{i \omega t} \quad (7)$$

$$191 \quad \frac{d^2 U_z(t)}{dt^2} = -u_z \omega^2 e^{i \omega t} \quad (8)$$

192 thus, equation (4) can be rewritten as:

$$193 \quad (-m_z \omega^2 + i c_z \omega + k_z) u_z e^{i \omega t} = F(t) \quad (9)$$

194 the term  $(-m \omega^2 + i c \omega + k)$  is called the dynamic stiffness of the soil layer. In the above equations,  
195 damping ratio can be used instead of viscous damping. Therefore, the concept of complex stiffness is  
196 used by the following equations (Kramer, 1996):

$$197 \quad K_z^* = i \omega c_z + k_z \quad (10)$$

198 where  $K^*$  is the complex stiffness. It can be expressed by the following equation as well (Kramer,  
199 1996):

$$200 \quad K_z^* = (1 + \eta_z i) k_z \quad (11)$$

201 where  $\eta$  is the hysteresis damping. Based on the energy balances, the correlation between hysteresis  
202 and viscous damping has been presented as (Roesset and Whitman, 1973):

$$203 \quad \eta_z = 2 \zeta_z \quad (12)$$

204 where  $\zeta$  is the damping ratio. Comparing equation 10 to 12, one can write:

$$205 \quad K_z^* = (1 + 2 \zeta_z i) k_z \quad (13)$$

206 thus, equation (9) can be rewritten as:

$$207 \quad [-m_z \omega^2 + (1 + 2 \zeta_z i) k_z] u_z e^{i \omega t} = F(t) \quad (14)$$

208  
209 *Calculation of displacement*

210

211 It is necessary to obtain the required motion parameters from propagating seismic wave in the ground  
212 to perform a seismic analysis. For this purpose, there are devices that record seismic data (e.g.



213 acceleration) at specific time intervals. Various techniques are available to relate the discrete recorded  
 214 data to desired data of an analysis. Assuming the  $\varphi(t)$  as a function which is defined by  $A$  discrete  
 215 points in  $\Delta t$  time intervals, it can be written as follows:

$$216 \quad \phi(t) = \phi(a\Delta t) \quad , \quad a=0, 1, \dots, A-1 \quad (15)$$

217 Discrete Fourier Transform (DFT) of this function is presented as (Bazrafshan moghaddam and  
 218 Bagheripour, 2011):

$$219 \quad \Phi(b\Delta\omega) = \Delta t \sum_{a=0}^{A-1} \phi(a\Delta t) e^{-ib\Delta\omega a\Delta t} \quad , \quad b=0, 1, \dots, A-1 \quad (16)$$

220 where  $\Phi(\omega)$  is the Fourier transform of the  $\varphi(t)$ ,  $\Delta\omega$  is the angular frequency interval. Since the  $\Phi(\omega)$   
 221 has the period of  $(2\pi/\Delta t)$  and it is defined by  $A$  discrete points:

$$222 \quad \Delta\omega = \frac{2\pi}{A\Delta t} = \frac{2\pi}{T} \quad (17)$$

223 where  $T$  is the time duration of recorded data. In practice, the highest frequency that can be analyzed is  
 224 the Nyquist frequency which is calculated as (Idriss and Sun, 2001):

$$225 \quad \omega_{nyq} = \frac{\pi}{\Delta t} \quad (18)$$

226 In this study, the above equations are used to relate the time and frequency domains.

227 According to equation (14), displacement of each harmonic component of the loading is calculated as:

$$228 \quad u_z(\omega) = f(\omega) / \left[ -m_z \omega^2 + k_z (1 + 2\xi_z i) \right] \quad (19)$$

229 where  $f(\omega)$  and  $u_z(\omega)$  are the Fourier transforms of the exciting force and of the displacement of the  $z^{\text{th}}$   
 230 soil layer, respectively. The linear displacement in the frequency domain is calculated by the latter  
 231 equation. Nonlinear behavior of the soil which is time-dependent is applied to the soil by the pseudo-  
 232 forces in a rational iterative procedure. Therefore, the displacement in the time domain is obtained  
 233 based on the calculated displacement in the frequency domain. As a result, the effective shear strain is  
 234 computed as a percentage of peak shear strain. The computed response is not particularly sensitive to  
 235 this percentage, it is often taken as 65% (Kramer, 1996). The new values of shear modulus and  
 236 damping ratio of each soil layer are estimated by the shear modulus reduction and damping ratio

237 curves. Figure 2 shows an example of these curves. Pseudo-forces are calculated in time domain as:

$$238 \quad \Delta Q_{z,j}(t) = (c_{z,o} - c_{z,j})\dot{U}_{z,j-1}(t) + (k_{z,o} - k_{z,j})U_{z,j-1}(t) \quad (20)$$

239 where  $\Delta Q(t)$  is the pseudo-force in time domain and  $j$  is the number of iteration. The total value of  
240 pseudo-forces in  $j^{\text{th}}$  iteration is computed as:

$$241 \quad Q_{z,j}(t) = \sum_{k=1}^j \Delta Q_{z,k}(t) \quad (21)$$

242 using the calculated  $Q(t)$ , displacement of the  $z^{\text{th}}$  soil layer is recalculated as:

$$243 \quad u_{z,j}(\omega) = f_{z,o}(\omega) + Q_{z,j}(\omega) / [-m_z \omega^2 + k_{z,j}(1 + 2\xi_z i)] \quad (22)$$

244 where  $Q(\omega)$  is the Fourier transform of the pseudo-force,  $Q(t)$ . This iteration process is continued until  
245 the pseudo-forces become smaller than a pre-defined value. It is obvious that the values of the  
246 aforementioned forces depend on the estimated dynamic properties of the soil layer in each step of  
247 iteration which are obtained based on the effective shear strain values. Thus, the convergence is  
248 controlled by comparing shear strain values of two consecutive iterations (Idriss and Sun, 2001):

$$249 \quad \left| \frac{\gamma_{z,j+1} - \gamma_{z,j}}{\gamma_{z,j}} \right| < \varepsilon, \quad 10^{-5} < \varepsilon < 10^{-3} \quad (23)$$

250

### 251 **Criteria of Convergence**

252

253 In each step of iterations, the following conditions must be met to establish the convergence of the  
254 calculations:

- 255 • The value of the dynamic stiffness should not be zero because in this case the displacement of  
256 soil layer can not be calculated.
- 257 • The calculated values of the pseudo-forces in each step of iteration should be smaller than  
258 their corresponding values of the previous iteration.
- 259 • The differences between calculated values of shear strain in successive steps of iteration must  
260 be descending until it becomes smaller than a pre-defined negligible value. This causes the  
261 values of the pseudo-forces to become negligible.

262 Considering that dynamic and geometric characteristics of the soil deposit differ in each case of  
263 analysis, the convergence of the process in each step of iteration must be carefully controlled in  
264 accordance with the foregoing.

265

#### 266 **Verification of the proposed method**

267

268 The accuracy of the proposed method is verified by comparing its results with the recorded data of the  
269 real earthquakes. A computer program is written in the MATLAB environment to perform the  
270 calculations of the proposed method. The recorded earthquake accelerograms at Gilroy 1 (rock) and  
271 recorded data at Gilroy 2 stations are used as input motions and controlling data, respectively. Gilroy 2  
272 is located 2 km east of Gilroy 1 where its soil profile is composed of various layers of gravel, sand and  
273 clay and level of the water table is at a depth of 21 m (EPRI, 1993). Gilroy 2 soil profile properties are  
274 presented by Table 1. The shear modulus degradation and damping ratio curves which are provided  
275 from laboratory tests, depicted in figure 2 (EPRI, 1993). The necessary and sufficient information for  
276 the equivalent linear method are those that given in Table 1 and Figure 2. This is all the data SHAKE  
277 needed. It is noteworthy that DEEPSOIL uses the same input parameters to compute the backbone  
278 curve which is best fit the problem. Philips and Hashash (2009) has described this calculation  
279 procedure in detail. It is obvious that more realistic results need more in-situ and laboratory tests to  
280 obtain more detailed soil parameters.

281 Presenting an applied method which is using the general data provided in the most of the geotechnical  
282 investigations (without the need for more dynamic in-situ or laboratory test) to analyze the seismic  
283 ground response is one of the advantages of the proposed hybrid method. Most often, the equivalent  
284 linear method is used for this purpose which provides an approximation to the ground response.  
285 Therefore, in most cases a nonlinear analysis is also performed. However, due to its nonlinear  
286 calculation procedure the HFTD method can prevent this repetition.

287 The results of the proposed method, in addition to the recorded data are compared with the results of  
288 the equivalent linear and nonlinear methods. In this study, the computer programs SHAKE (Idriss and

289 Sun, 2001) and DEEPSOIL (Hashash, et al., 2011) are applied to perform the equivalent linear and  
290 nonlinear analyses, respectively.

291

292 *Site response analysis at Gilroy 2 underwent Loma Prieta earthquake*

293

294 Loma Prieta earthquake (M=6.9) is occurred in a close distance of the Gilroy array. Figure 3 shows  
295 this earthquake accelerogram and its Fourier spectrum while Table 2. presents the summary  
296 of parameters for this motion. Figure 4(a) shows the recorded acceleration time history at Gilroy 2 and  
297 the result of the current study at the surface level. As could be seen, the result of the proposed method  
298 is in good agreement with the recorded data. The result of the HFTD method is compared  
299 to the ones of the equivalent linear and nonlinear methods in Figure 4(b). According to this figure, the  
300 results of different methods show good agreement, however the predicted values of the equivalent  
301 linear method are higher than other methods as well as the recorded values. Figure 5 compares the  
302 acceleration Fourier amplitudes on the ground surface. It is observed that in the frequencies less than 1  
303 Hz the provided results by SHAKE and DEEPSOIL have the largest and the smallest values,  
304 respectively. It is also observed that in the frequencies up to 2.5 Hz, the provided results of the HFTD  
305 method are larger than the recorded. It worth to note, SHAKE is using the conventional equivalent  
306 linear procedure. This method is inherently linear and estimates the seismic ground response after  
307 some iteration steps. It generally tends to overestimate results in strong earthquakes and vice versa.  
308 This issue has been examined several times by different researchers (Lo Presti, et al., 2006, Ohsaki,  
309 1982, Yoshida, et al., 2002). Therefore, some studies have tried to improve this method (Assimaki and  
310 Kausel, 2002, Kausel and Assimaki, 2002). On the other hand,

311 damping calculations play an important role in the accuracy of the nonlinear soil behavior models. In  
312 general, there are two major shortcomings while using the reloading-unloading criteria including those  
313 used in DEEPSOIL (i.e. Masing criteria) in the calculation of the hysteresis loop:

- 314 • Refraining from small strains, the behavior is assumed as linear whereas in the small strains,  
315 damping controls soil behavior (Bazrafshan moghaddam and Bagheripour, 2011).
- 316 • At the large strains, damping is overestimated (Hashash and Park, 2002).

317 Figure 6 shows the acceleration response spectra for the damping of 10%. As this figure shows, the  
318 HFTD method presents close values compared to the recorded data. The equivalent linear method  
319 tends to overestimate the results in the periods up to about 1 second and then presents close values  
320 compared to the HFTD and recorded data. On the other hand, the nonlinear method tends to  
321 underestimate the results, however its trend is in good agreement with the other spectra. Figure 7  
322 shows the displacement time history at the ground surface of the site for Loma Prieta earthquake.  
323 Figure 7(a) compares the obtained results of the current study to the recorded data at the site, where  
324 close values are observed. Figure 7(b) shows results of different analysis methods. The results of all  
325 applied methods follow the same trend and predict close values, although overestimation is observed  
326 in the results of the equivalent linear method. Peak ground acceleration profile is shown in Figure 8.  
327 Based on this figure, similar trends are presented by all three methods, however nonlinear method  
328 predicts smaller values, in general. Maximum of the PGA values are observed between depths of about  
329 zero to 5 meters, besides PGA is increased at the depth of 40 m, compared to its upper and lower  
330 levels. Noted, at the depth of 0-5 and 40 m the soil profile is composed of sand layers.

331

332 *Site response analysis at Gilroy 2 underwent Morgan Hill earthquake*

333

334 Morgan Hill earthquake (M=6.2) has occurred in the vicinity of the Gilroy array and is studied in this  
335 paper. Figure 9 shows this earthquake acceleration time history and its Fourier spectrum. The  
336 summary of this earthquake parameters is provided in Table 3. Fig 10 shows the time histories of  
337 acceleration at the ground surface, obtained from analyses and recorded data. Fig 10(a) depicts a  
338 comparison between the results of the HFTD method and recorded data at the site. According to  
339 Figure 10(b), the results of the applied methods provide approximately the same values. Besides, these  
340 results are reasonably accurate compared to the recorded data. As can be seen in Figure 10, the peak  
341 acceleration value in all obtained results is increased compared to the input motion [Figure 9(a)] which  
342 shows the site effects on the applied motion. The acceleration response spectra for damping of 10%  
343 are shown in Figure 11. According to this figure, the nonlinear method provides close prediction to the  
344 recorded data. The HFTD procedure presents slightly higher values compared to the recorded ones in

345 the periods up to 1 second. Due to the small differences in the values of these two spectra, these  
346 differences provide safety in the calculation. After this period, results of all methods show close  
347 values, however the HFTD presents the closest values to the recorded spectrum. As observed in Figure  
348 10 and 11, the equivalent linear method predicts the smaller values compared to the other methods.  
349 Unlike Loma Prieta, Morgan Hill earthquake is classified among the weak earthquakes with regard to  
350 its acceleration and frequency content. As can be seen, the equivalent linear method tends to  
351 underestimate the results for this event, however in strong Loma Prieta motion the results are quite  
352 contrary. This is in agreement with the conclusions of the other researchers (Lo Presti, et al., 2006,  
353 Yoshida, et al., 2002). Figure 12 shows the acceleration Fourier amplitude on the ground surface. As  
354 could be seen in this figure, provided results of all methods are nearly the same. The reason is low  
355 intensity of this earthquake which causes the small values of shear strain. Figure 13 shows the  
356 comparison of time histories of displacement at the ground surface for this earthquake. According to  
357 Figure 13(a), the results of the current study and recorded data are nearly the same. As Figure 13(b)  
358 shows, the HFTD and nonlinear methods are almost provided the same values for all loading duration,  
359 while the result of the equivalent linear method is associated with some differences in values. The  
360 observed differences in the equivalent linear result compared to other data are because of its inherently  
361 linear nature. On the other hand, the HFTD and nonlinear methods are modeled nonlinear behavior of  
362 soil properly. It must be remembered, although DEEPSOIL is a nonlinear program, but it does not  
363 mean that it can predict the actual behavior and response of the soil deposits. This program provides  
364 acceptable results based on its simple input data. It uses the hyperbolic backbone curve which is the  
365 simplest soil constitutive model (Hashash and Park, 2002). This program also uses modified Rayleigh  
366 damping matrix (Hashash and Park, 2002) which withdraws some terms of the soil damping for the  
367 simplicity of the calculations and it has the inevitable problems of the unloading-reloading criteria  
368 (Hashash and Park, 2002). Figure 14 shows the peak ground acceleration profile in the soil column.  
369 Results of all applied methods are increased at depth of 0-8 m, however PGA changes are smooth in  
370 other depths.

371

372

373  
374  
375  
376  
377  
378  
379  
380  
381  
382  
383  
384  
385  
386  
387  
388  
389  
390  
391  
392  
393  
394  
395  
396  
397  
398  
399  
400  
401

**Conclusion**

Hybrid frequency-time domain procedure is used to analyze nonlinear one-dimensional seismic response of a layered soil deposit. Fourier Transform and its inverse is paved the way to solve the dynamic equation of motion in the frequency domain. Nonlinear behavior of soil under dynamic loadings is modeled in the time domain by applying pseudo-forces in a rational iteration procedure. This paper is presented a method that performs nonlinear seismic ground response analysis without need for calibration of the constitutive models parameters which are inevitable in the conventional nonlinear methods. In the proposed method, the computational efforts are significantly reduced by solving the equation of motion in the frequency domain. The results of the proposed method are verified by comparing them to the recorded data of two different earthquakes and results of the equivalent linear and nonlinear methods which are provided by SHAKE and DEEPSOIL computer programs, respectively.

**References**

Aki, K. (1988). *Local site effects on strong ground motion*, ASCE Geotechnical Special Publication, Park City, Utah.

Asgari, A., and Bagheripour, M. H. "Earthquake Response Analysis of Soil Layers Using HFTD Approach." *Proc., GeoShanghai 2010 International Conference*, American Society of Civil Engineering.

Assimaki, D., and Kausel, E. (2002). "An equivalent linear algorithm with frequency and pressure dependent moduli and damping for seismic analysis of deep sites." *Journal of soil dynamics and earthquake engineering*, 22, 959-965.

Bagheripour, M. H., and Zhao, C. (1992). *WDF 2-D Finite-infinite dynamic element program*, University of N.S.W., Sydney, Australia.

Bardet, J. P., Ichii, K., and Lin, C. H. (2000). *EERA: A computer program for Equivalent-linear Earthquake site Response Analysis of layered soil deposits*, University of Southern California, Department of Civil Engineering.

402 Bazrafshan moghaddam, A., and Bagheripour, M. H. (2011). "Ground response analysis using non-recursive  
403 matrix implementation of hybrid frequency-time domain (HFTD) approach." *Scientia Iranica*, 18(6),  
404 1188–1197.

405 Bernal, D., and Youssef, A. (1998). "A hybrid time frequency domain formulation for non-linear soil–structure  
406 interaction." *Earthquake Engineering & Structural Dynamics*, 27(7), 673–685.

407 Chopra, A. K. (1995). *Dynamic of structures*, Prentice Hall, New Jersey.

408 Chuhan, Z., and Zhao, C. (1987). "Coupling methods of finite and infinite elements for strip foundation wave  
409 problems." *Journal of Earthquake Engineering and Structural Dynamics*, 15, 839–851.

410 Clough, R. W., and Penzien, J. (1993). *Dynamics of structures*, McGraw Hill, New York.

411 Darbre, G. R., and Wolf, J. P. (1988). "Criterion of stability and implementation issues of hybrid frequency-time-  
412 domain procedure for non-linear dynamic analysis." *Journal of Earthquake Engineering and Structural  
413 Dynamics*, 16, 569–581.

414 Day, R. W. (2002). *Geotechnical earthquake engineering handbook*, McGraw-Hill, New York.

415 Diagourtas, D., Tzani, A., and Makropoulos, K. (2001). "Comparative study of microtremor analysis methods."  
416 *Journal of Pure and Applied Geophysics*, 158, 2463–2479.

417 Ding, H. P., and Liao, Z. P. (2001). "A hybrid analysis method for linear dynamic soil-structure interaction in  
418 time and frequency domain." *Journal of ACTA Seismologica Sinica*, 14(4), 440–447.

419 Elgamal, A. W., Yang, Z., Parra, E., and Ragheb, A. (1998). *CYCLIC 1D: An Internet-based finite element  
420 computer program for one dimensional site amplification analysis using an incremental plasticity  
421 coupled soil-fluid (u-p) formulation*, University of California, San Diego.

422 EPRI (1993). "Guidelines for determining design basis ground motions." Electric Power Research Institute, New  
423 Jersey.

424 Faccioli, E. "Seismic amplification in the presence of geological and topographic irregularities." *Proc.,  
425 International conference on recent advances in geotechnical earthquake engineering and soil dynamics*,  
426 1779–1797.

427 Ferrini, M. (2001). *Numerical modelling for the evaluation of seismic response at Castelnouvo Garfagnana in  
428 central Italy*.

429 Hardin, B., and Drnevich, V. (1972). "Shear modulus and damping in soils: design equation and curves."  
430 *Journal of the Soil Mechanics and Foundations Division, ASCE*, 98, 667–692.

431 Hashash, Y. M. A., Groholski, D. R., Phillips, C. A., Park, D., and Musgrove, M. (2011). *DEEPSOIL 4.0, user*



432 *manual and tutorial*, University of Illinois, Department of Civil and Environmental Engineering, Urbana-  
433 Champaign, Illinois.

434 Hashash, Y. M. A., and Park, D. (2001). "Non-linear one-dimensional seismic ground motion propagation in the  
435 mississippi embayment." *Journal of Engineering Geology*, 62, 611-624.

436 Hashash, Y. M. A., and Park, D. (2002). "Viscous damping formulation and high frequency motion propagation  
437 in non-linear site response analysis." *Journal of Soil dynamics and Earthquake Engineering*, 22, 611-624.

438 Heisey, J. S. (1982). "Determination of in-situ shear waves velocity from spectral- analysis-of-surface-waves."  
439 Msc., University of Texas, Austin.

440 Idriss, I., and Sun, J. (2001). *User's manual for Proshake*, U.S. National Institute of Standard and Technology  
441 and University of California.

442 Idriss, I. M., and Sun, J. I. (1992). *SHAKE 91: A computer program for conducting equivalent linear seismic  
443 response analyses of horizontally layered soil deposits*, University of California, Davis.

444 Iwan, W. D. (1967). "On a class of models for the yielding behavior of continuous and composite systems."  
445 *Journal of Applied Mechanics*, 34, 612-617.

446 Kausel, E., and Assimaki, D. (2002). "Seismic simulation inelastic soils via frequency-dependent moduli and  
447 damping." *Journal of Engineering Mechanics, ASCE*(128).

448 Kawamoto, J. D. (1983). "Solution of nonlinear dynamic structural systems by a hybrid frequency–time domain  
449 approach." Massachusetts Institute of Technology, Department of Civil Engineering.

450 Kim, Y., and Roesset, J. M. (2004). "Effect of nonlinear soil behavior on inelastic seismic response of a  
451 structure." *International Journal of Geomechanics, ASCE*, 4(2), 104-114.

452 Kramer, S. L. (1996). *Geotechnical earthquake engineering*, Prentice Hall, Upper Saddle River, New Jersey.

453 Kwok, A. O. L., Stewart, J. P., Hashash, Y. M. A., Matasovic, N., Pyke, R., Wang, Z., and Yang, Z. (2007).  
454 "Use of exact solutions of wave propagation problems to guide implementation of nonlinear, time-domain  
455 ground response analysis routines." *Journal of Geotechnical and Geoenvironmental Engineering, ASCE*,  
456 133(11), 1385-1398.

457 Lee, M. K., and Finn, W. L. L. (1978). *DESRA 2C- Dynamic effective stress response analysis of soil deposits  
458 with energy transmitting boundary including assessment of liquefaction potential*, University of British  
459 Columbia, Department of Civil Engineering, Vancouver, Canada.

460 Lo Presti, D., and Ferrini, M. (2002). *Special Issue of the Italian Geotechnical Review: The seismic response  
461 analysis at Castelnouvo Garfagnana.*

462 Lo Presti, D. C. F., Lai, C. G., and Puci, I. (2006). "ONDA: Computer code for nonlinear seismic response  
463 analysis of soil deposits." *Journal of Geotechnical and Geoenvironmental engineering*, 132, 223-236.

464 Maheshwari, B. K., Truman, K. Z., Gould, P. L., and El Naggar, M. H. (2005). "Three-dimensional nonlinear  
465 seismic analysis of single piles using finite element model: Effects of plasticity of soil." *International  
466 Journal of Geomechanics, ASCE*, 5(1), 35-44.

467 Mansur, W. J., Carrer, J. A., Ferreira, W. G., Claret de Gouveia, A. M., and Venancio-Filho, F. (2000). "Time-  
468 segmented frequency-domain analysis for non-linear multi-degree of freedom structural systems."  
469 *Journal of Sound and Vibration*, 237(3), 457-475.

470 Martin, P. P., and Seed, H. B. (1978). "MASH: A computer program for the non-linear analysis of vertically  
471 propagating shear waves in horizontally layered deposits." University of California, Earthquake  
472 engineering research center, Berkley, California.

473 Masing, G. "Eigenspannungen und verfertigungbeim messing." *Proc., 2nd International Congresson of Applied  
474 Mechanics*.

475 Matasovic, N. (1993). "Seismic response of composite horizontally-layered soil deposits." Ph.D., University of  
476 California, Los Angeles.

477 Ohsaki, Y. (1982). "Dynamic non linear model and one-dimensional non linear response of soil deposits."  
478 Department of Architecture, Faculty of engineering, University of Tokyo.

479 Paz, M. (1997). *Structural dynamics- theory and computation, fourth ed.*, Chapman and Hall, New York.

480 Philips, C., and Hashash, Y. M. A. (2009). "Damping formulation for nonlinear 1D site response analyses."  
481 *Journal of soil dynamics and earthquake engineering*, 29, 1143-1158.

482 Prevost, J. (1977). "Mathematical modeling of monotonic and cyclic undrained clay behavior." *International  
483 journal of numerical and analytical methods in geomechanics*, 1 (2), 195-216.

484 Prevost, J. (1989). *DYNAID - A computer program for nonlinear seismic site response analysis: Technical  
485 documentation*, National Center for Earthquake Engineering Research, Buffalo, N.Y.

486 Pyke, R. (1979). "Nonlinear soil models for irregular cyclic loadings." *Journal of Geotechnical Engineering  
487 Division, ASCE*, 105, 715-726.

488 Ramberg, W., and Osgood, W. (1943). *Description of stress-strain curves by three parameters*, National  
489 Advisory Committee for Aeronautics, Washington D.C.

490 Roesset, J. M., and Whitman, R. V. (1973). "Modal analysis for structures with foundation interaction." *Journal  
491 of the Structural Division, ASCE*, 99, 399-416.

492 Schnabel, P. B., Lysmer, J., and Seed, H. B. (1972). *SHAKE: A computer program for earthquake response*  
493 *analysis of horizontally layered soil sites*, Earthquake Engineering Research Center, University of  
494 California, Berkeley.

495 Seed, H., Wong, R., Idriss, I., and Tokimatsu, K. (1984). *Moduli and damping factors for dynamic analyses of*  
496 *cohesionless soils*, Earthquake Engineering Research Center, University of California, Berkeley,  
497 California.

498 Seed, H. B., and Idriss, I. M. (1970). *Soil moduli and damping factors for dynamic response analyses*,  
499 Earthquake Engineering Research Center, University of California, Berkeley.

500 Streeter, V. L., Wylie, E. B., Benjamin, E., and Richart, F. E., Jr. (1974). "CHARSOIL: Soil motion  
501 computations by characteristics method." *Journal of the Geotechnical Engineering Division, ASCE*,  
502 100(3), 247-263.

503 Sun, J., Golesorkhi, R., and Seed, H. (1988). "Dynamic moduli and damping ratios for cohesive soils."  
504 Earthquake Engineering Research Center, University of California, Berkeley, California.

505 Von Estorff, O., and Firuziaan, F. (2000). "Coupled BEM/FEM approach for nonlinear soil/structure  
506 interaction." *Engineering Analysis with Boundary Elements*, 24, 715-725.

507 Wiggins, J. H. (1964). "Effect of site conditions on earthquake intensity." *Journal of Structural Division, ASCE*,  
508 90, 279-313.

509 Wilson, E. (1968). *A computer program for the dynamic stress analysis of underground structures*, Earthquake  
510 Engineering Research Center, University of California, Berkeley.

511 Wolf, J. P. (1986). "Nonlinear soil-structure-interaction analysis based on hybrid frequency-time domain  
512 formulation." *8th European conference of earthquake engineering* Lisbon, Portugal.

513 Wood, D. (2004). *Geotechnical modelling*, CRC Press, U.K.

514 Yoshida, N., Kobayashi, S., Suetomi, I., and Miura, K. (2002). "Equivalent linear method considering  
515 frequency dependant characteristics of stiffness and damping." *Journal of soil dynamics and earthquake*  
516 *engineering*, 22, 205-222.

517 Zamani, N., and Shamy, U. (2012). "Dem Simulations of the Response of Soil-Foundation-Structure Systems to  
518 Multidirectional Seismic Motion." *Journal of Geotechnical and Geoenvironmental Engineering, ASCE*,  
519 10.1061/(ASCE)GM.1943-5622.0000247.

Table 1

| No. | Thickness (m) | Soil type | Shear wave velocity |                               |
|-----|---------------|-----------|---------------------|-------------------------------|
|     |               |           | (m/s)               | $\gamma$ (kN/m <sup>3</sup> ) |
| 1   | 3             | Sand      | 184                 | 18.9                          |
| 2   | 5.1           | Sand      | 269                 | 18.9                          |
| 3   | 3.10          | Gravel    | 341                 | 18.9                          |
| 4   | 3.8           | Sand      | 341                 | 18.9                          |
| 5   | 4.5           | Clay      | 430                 | 18.9                          |
| 6   | 2.3           | Gravel    | 430                 | 18.9                          |
| 7   | 12.9          | Clay      | 270                 | 18.9                          |
| 8   | 3.3           | Sand      | 334                 | 20.9                          |
| 9   | 2             | Sand      | 504                 | 20.9                          |
| 10  | 12            | gravel    | 504                 | 20.9                          |
| 11  | 3             | gravel    | 717                 | 20.9                          |
| 12  | 5.8           | sand      | 717                 | 20.9                          |
| 13  | 2.2           | clay      | 717                 | 20.9                          |
| 14  | 11            | gravel    | 717                 | 20.9                          |
| 15  | 4.2           | gravel    | 527                 | 20.9                          |
| 16  | 16.6          | clay      | 527                 | 20.9                          |
| 17  | 4.2           | gravel    | 527                 | 20.9                          |
| 18  | 26            | gravel    | 704                 | 20.9                          |
| 19  | bedrock       | -         | 1190                | 22.6                          |

Table 2

| Parameters                      | Units   | Values |
|---------------------------------|---------|--------|
| Peak acceleration               | (g)     | 0.436  |
| Arias intensity                 | (m/sec) | 1.324  |
| Acceleration spectrum intensity | (g.sec) | 0.492  |
| Predominant period              | (sec)   | 0.380  |

RETRACTED

Table 3

| Parameters                      | Units   | Values |
|---------------------------------|---------|--------|
| Peak acceleration               | (g)     | 0.099  |
| Arias intensity                 | (m/sec) | 0.060  |
| Acceleration spectrum intensity | (g.sec) | 0.062  |
| Predominant period              | (sec)   | 0.140  |

RETRACTED

Figure 1

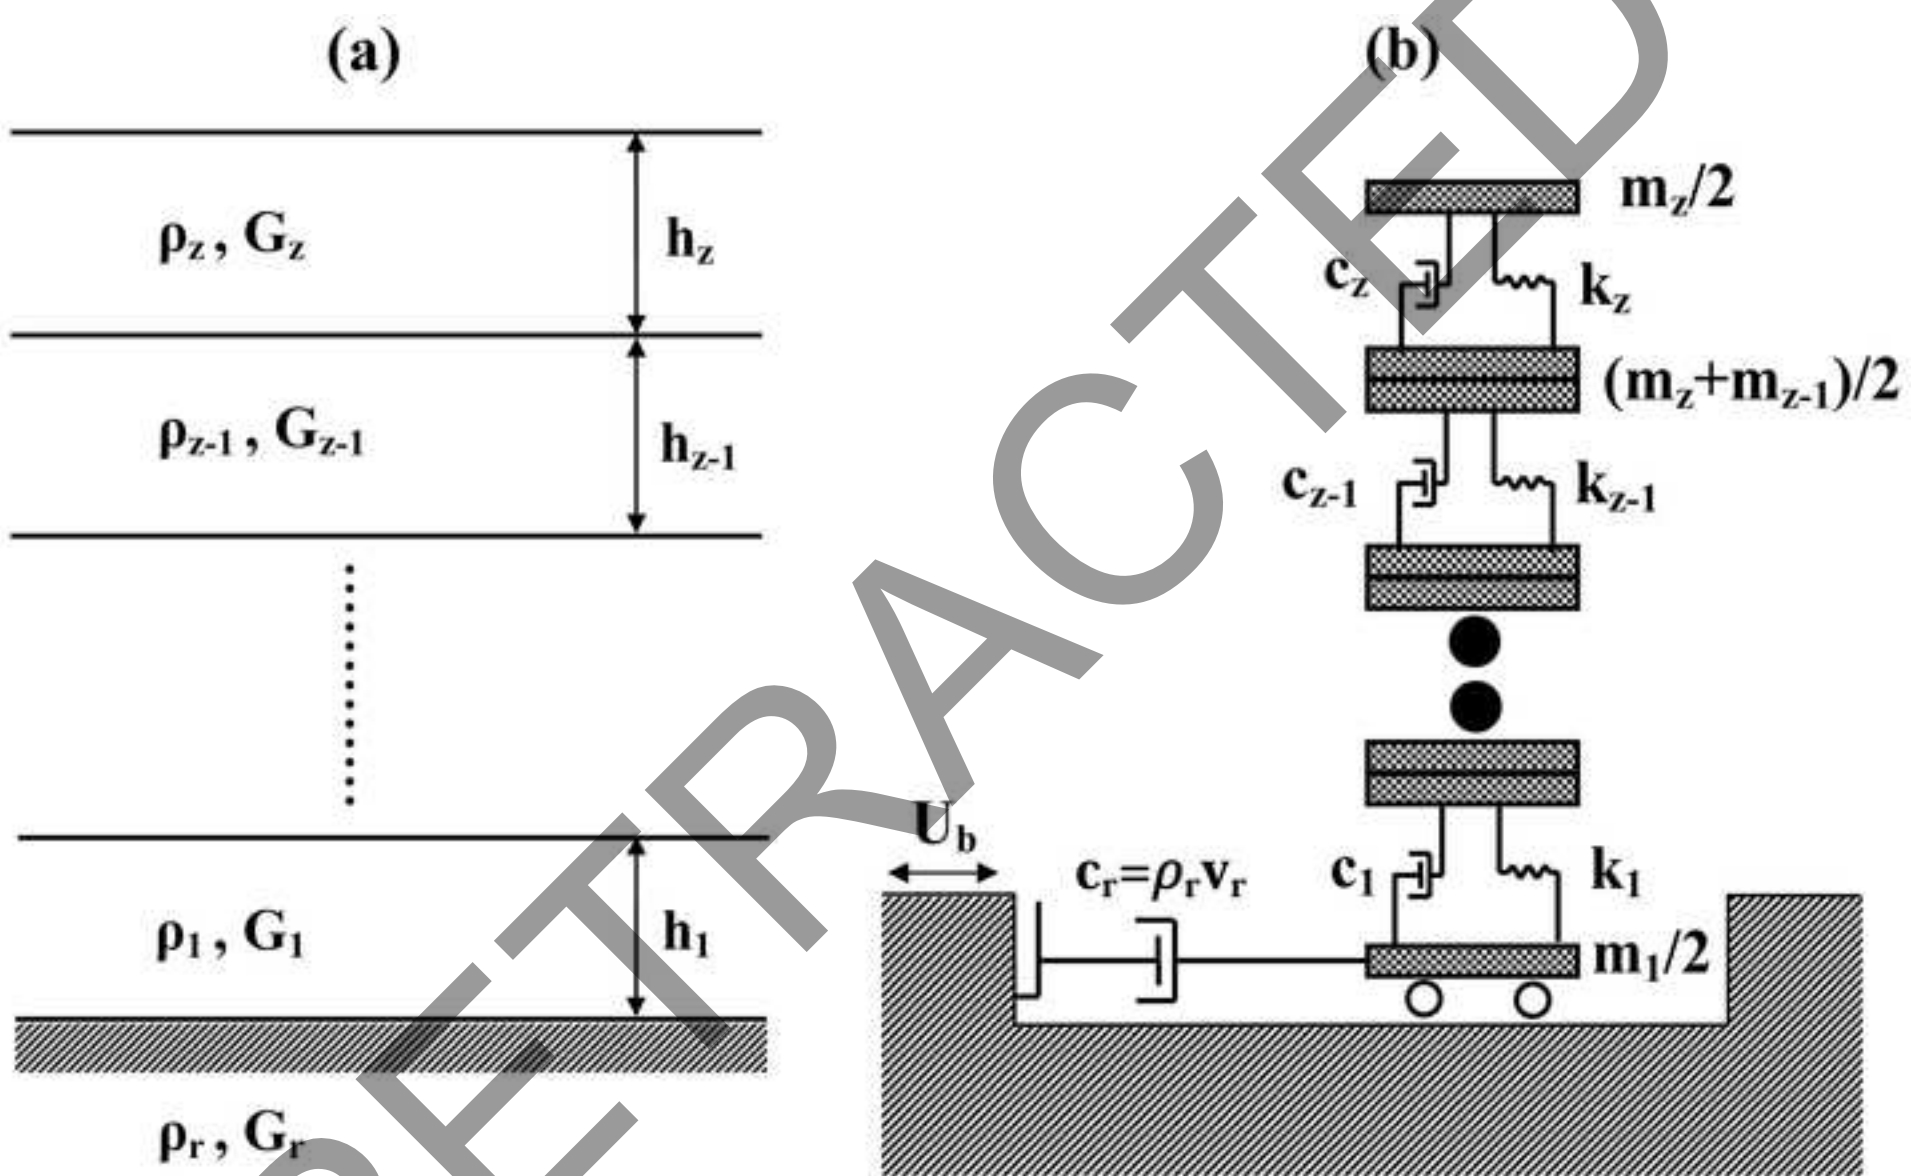

Figure 2

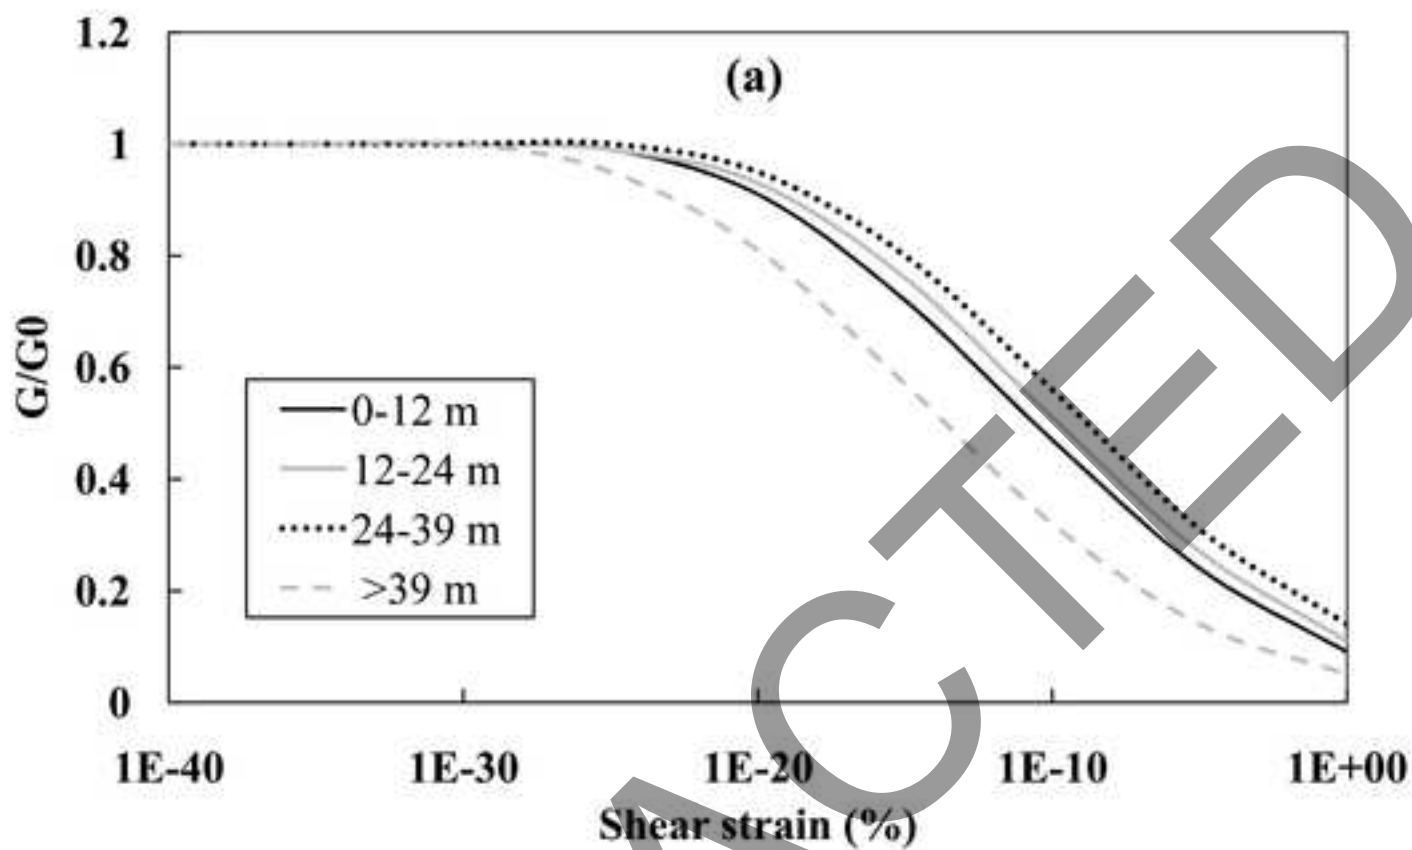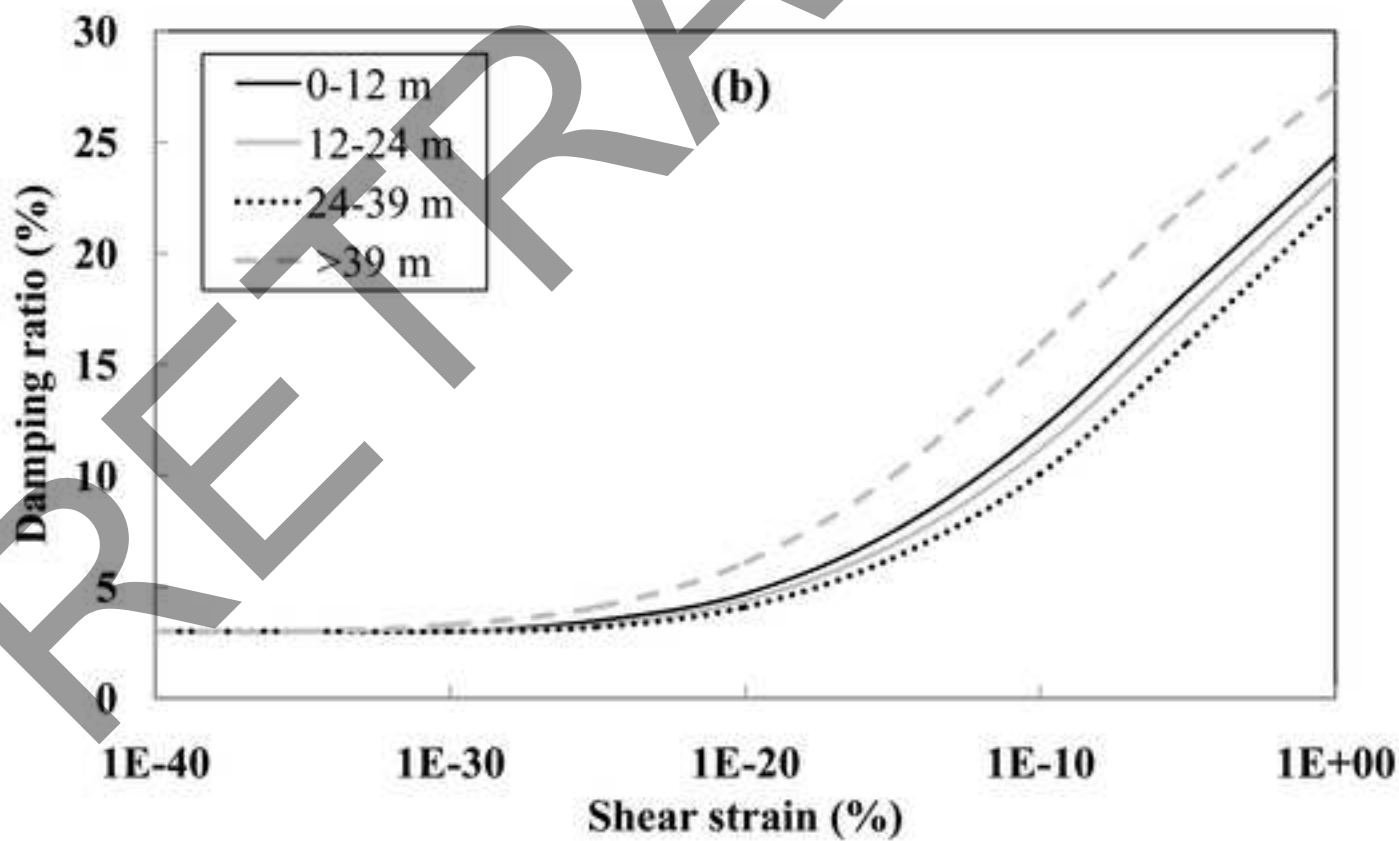



Figure 3

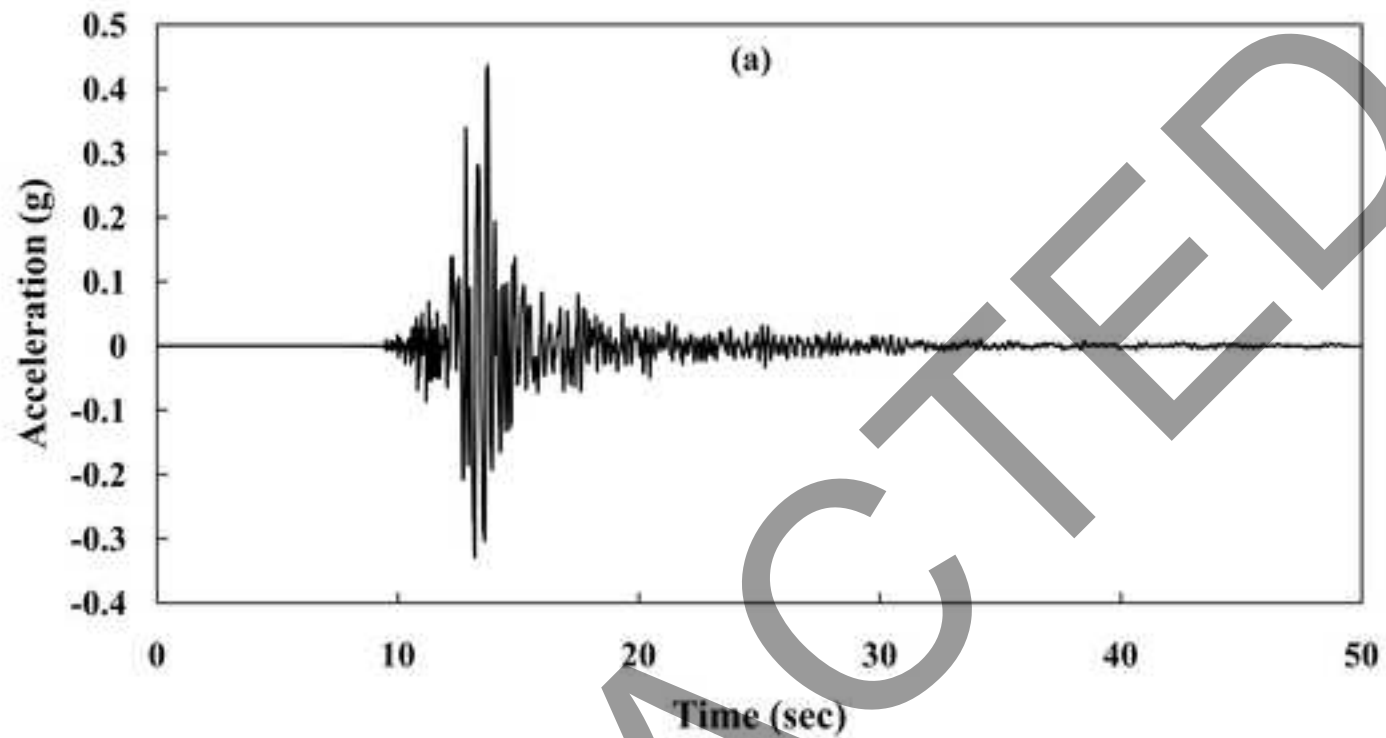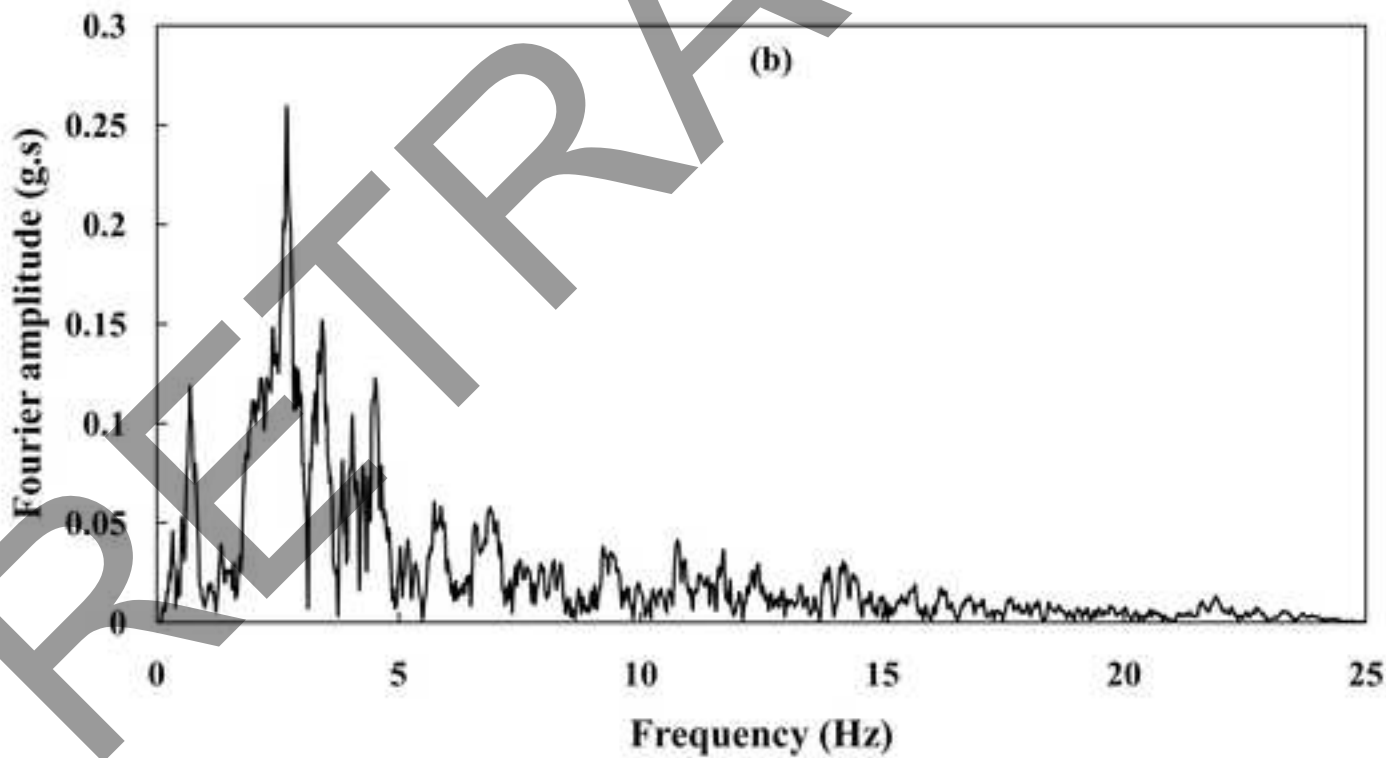

Figure 4

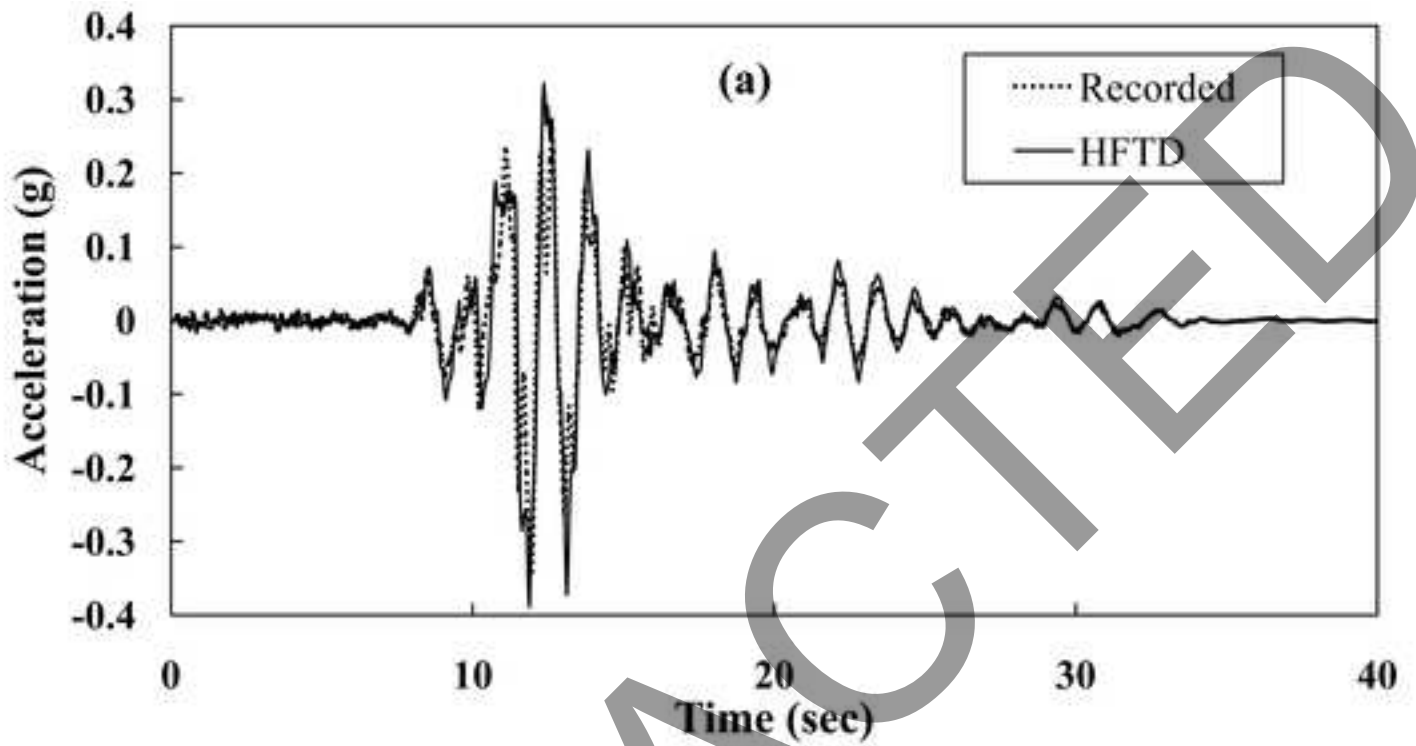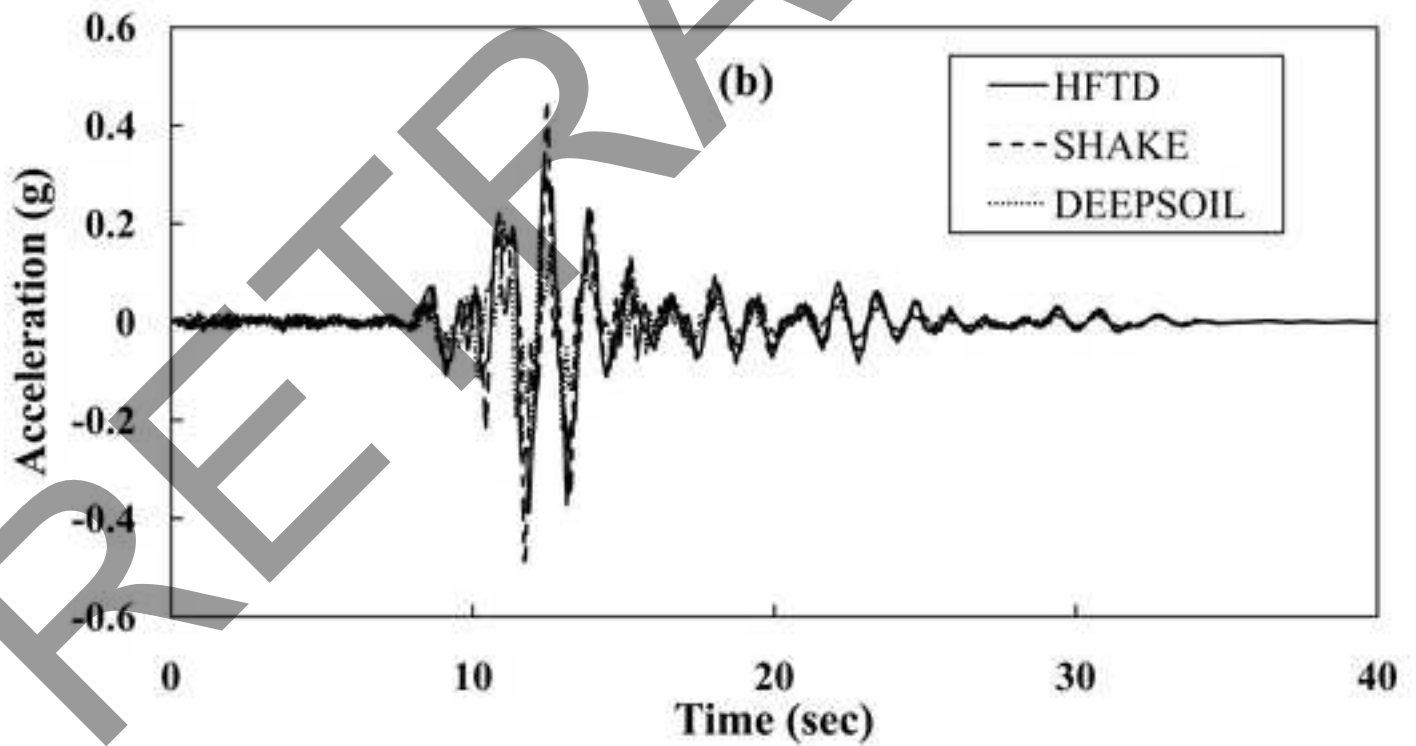

Figure 5

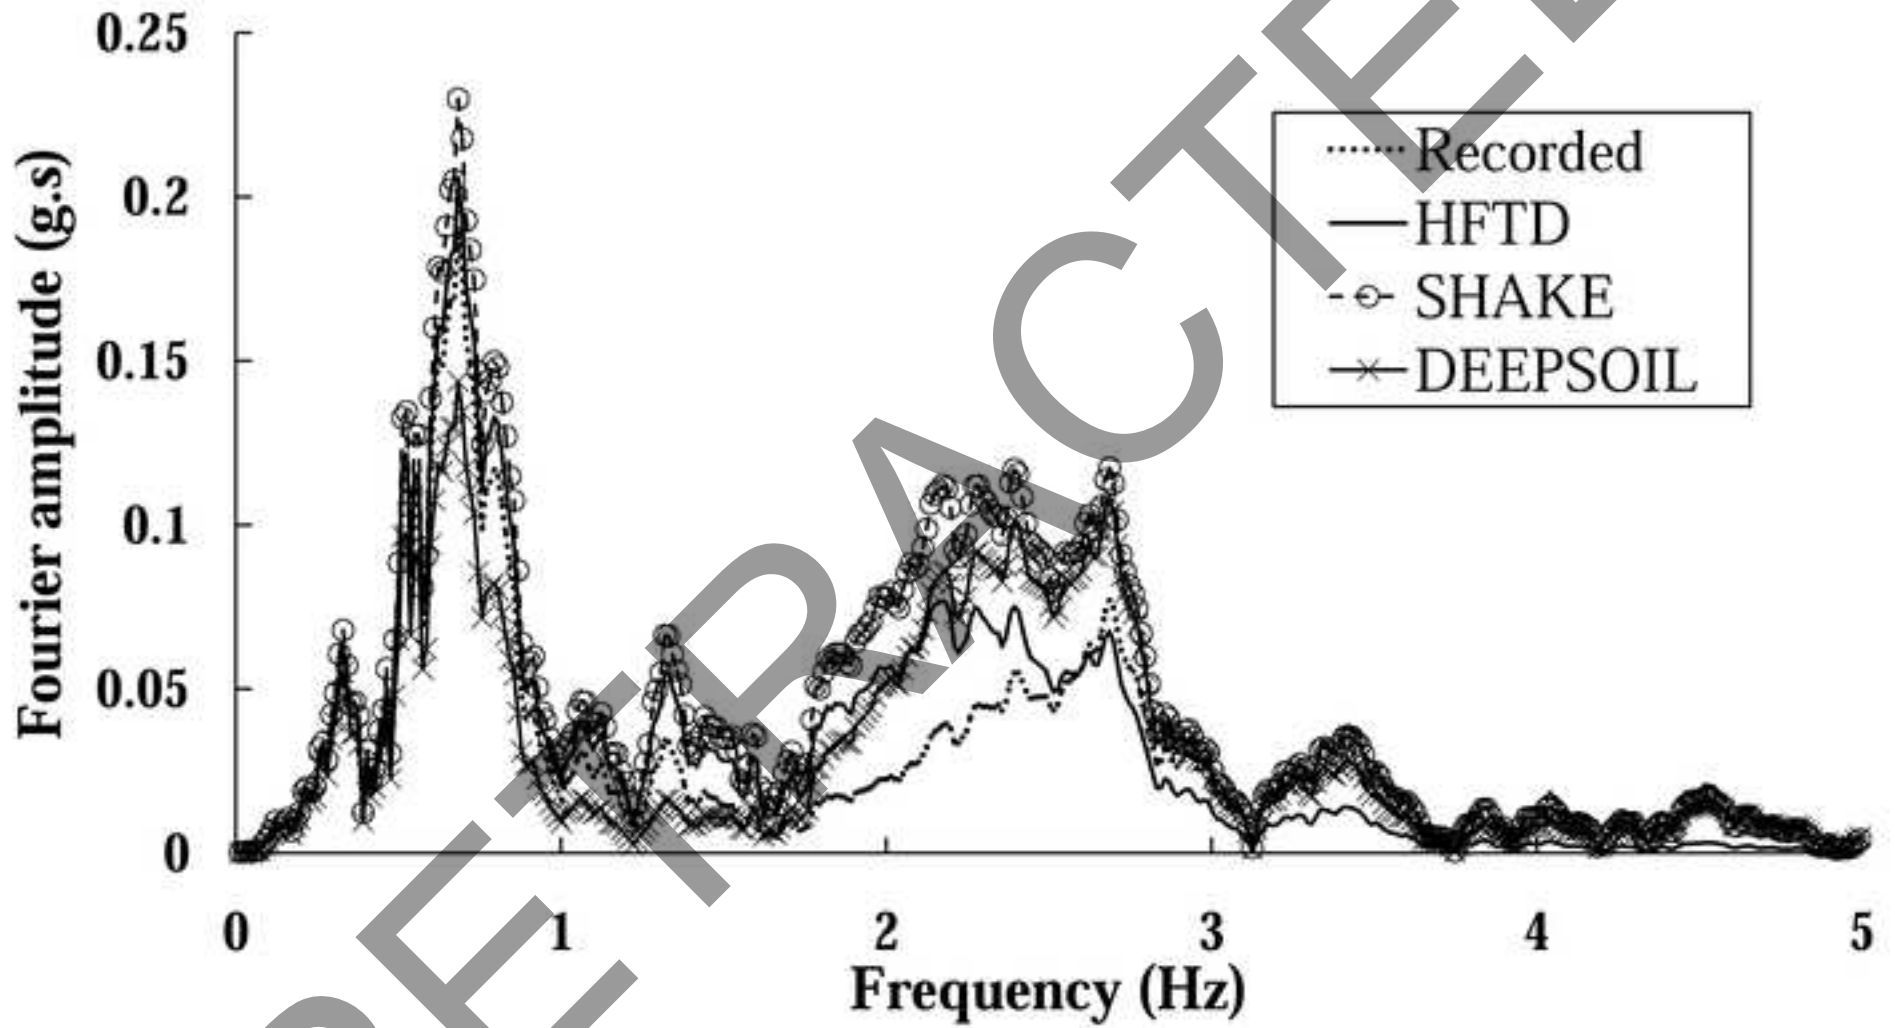

Figure 6

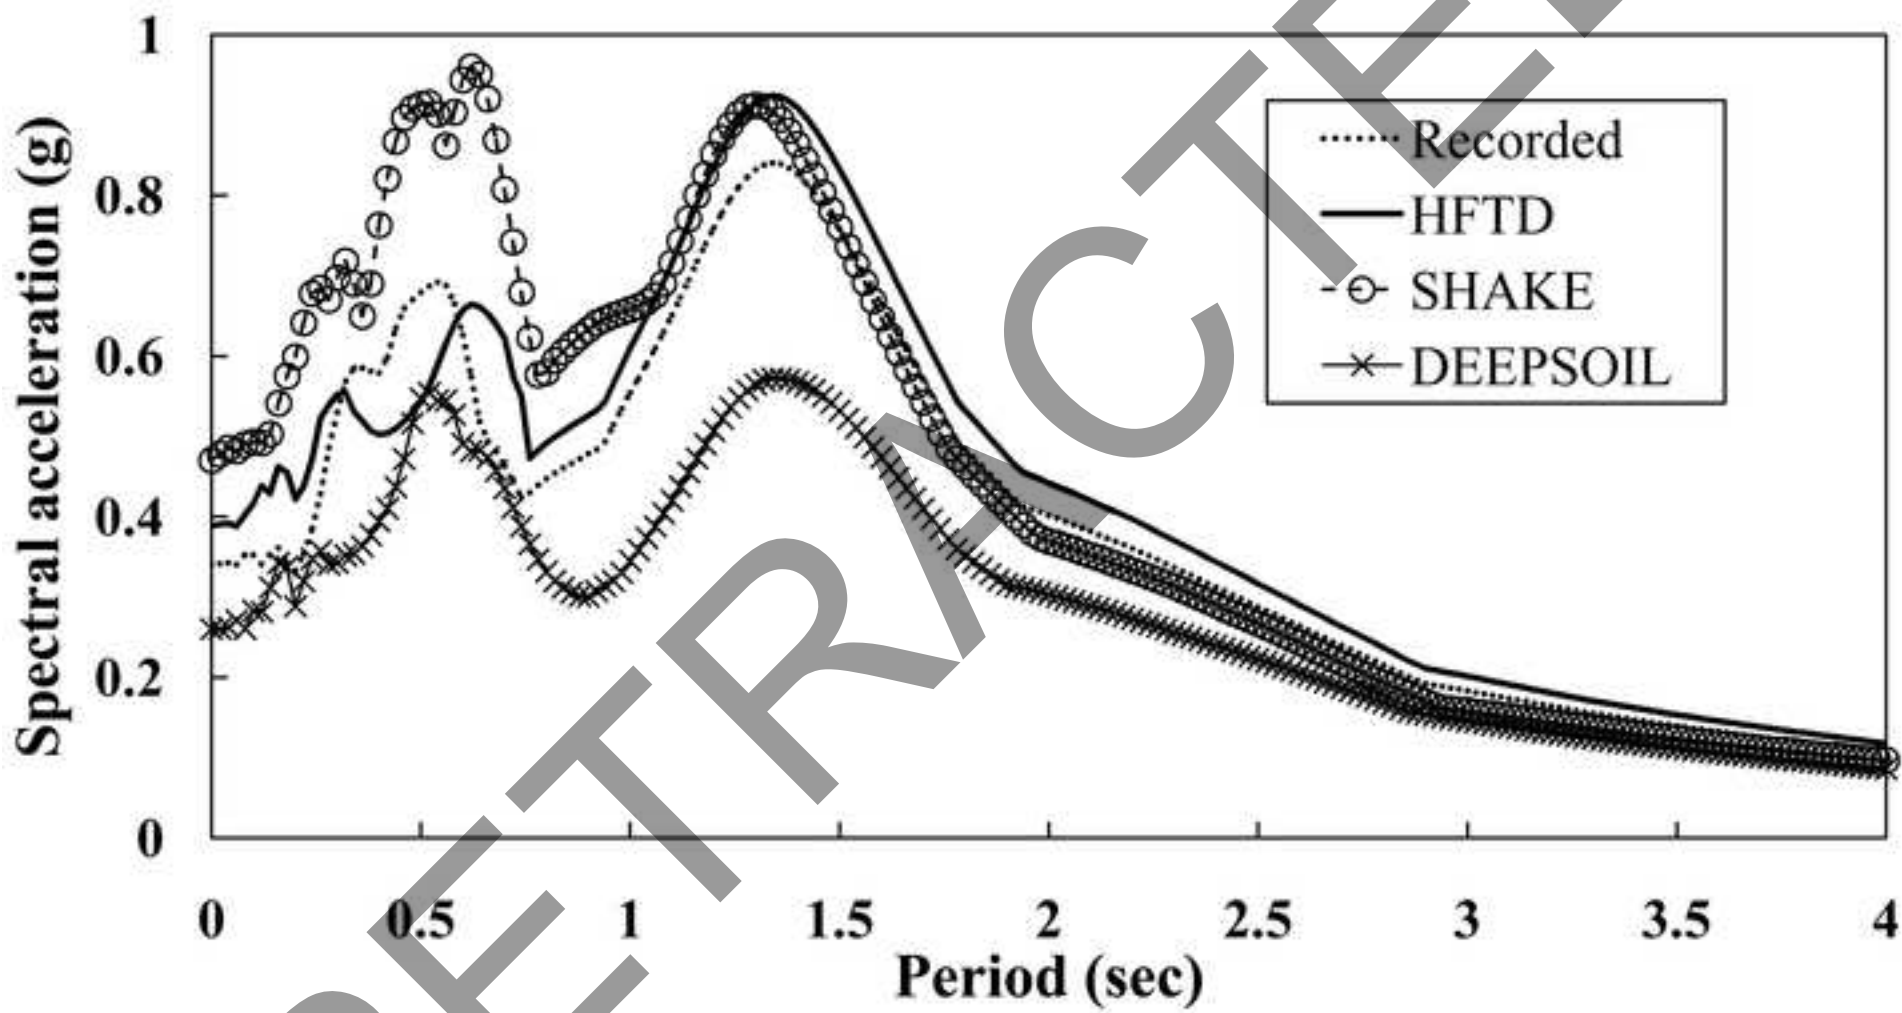

Figure 7

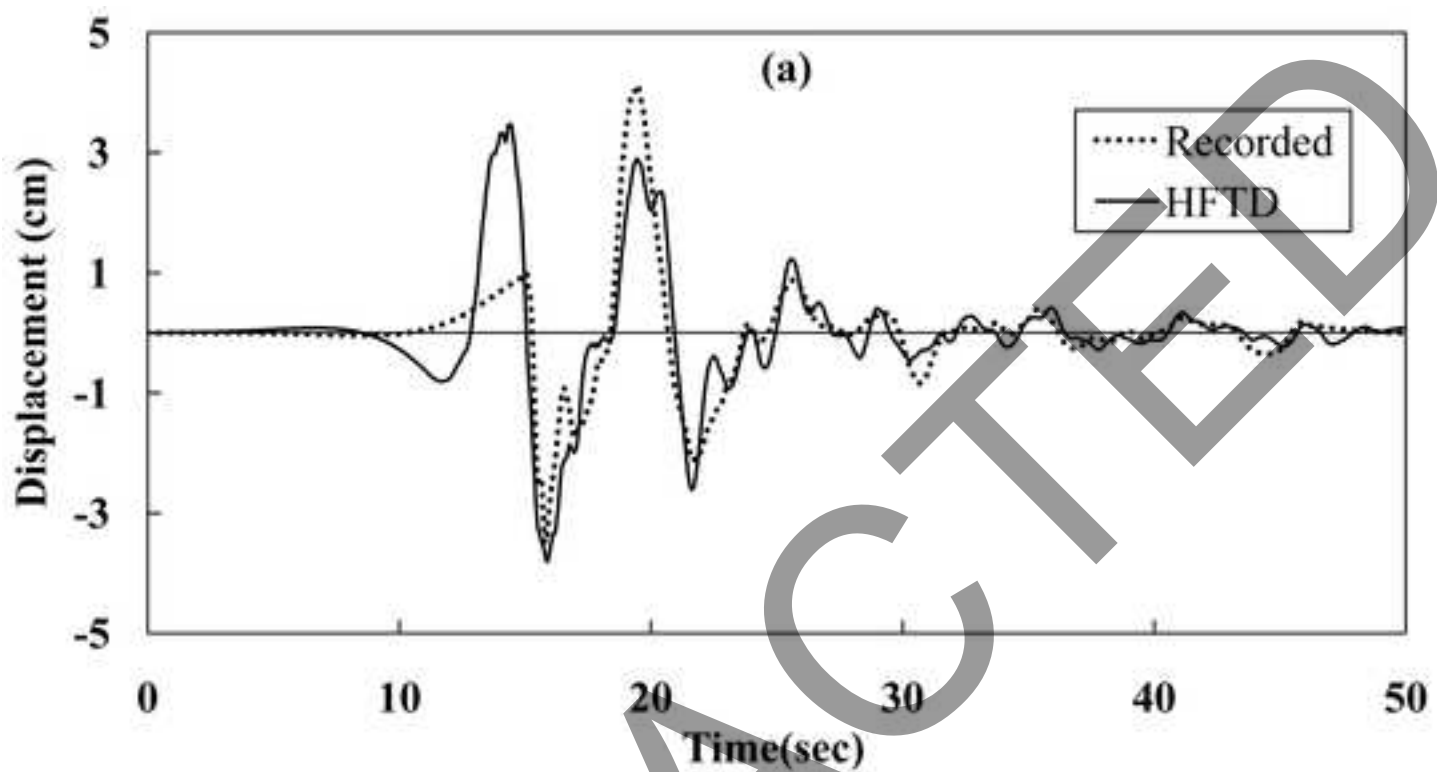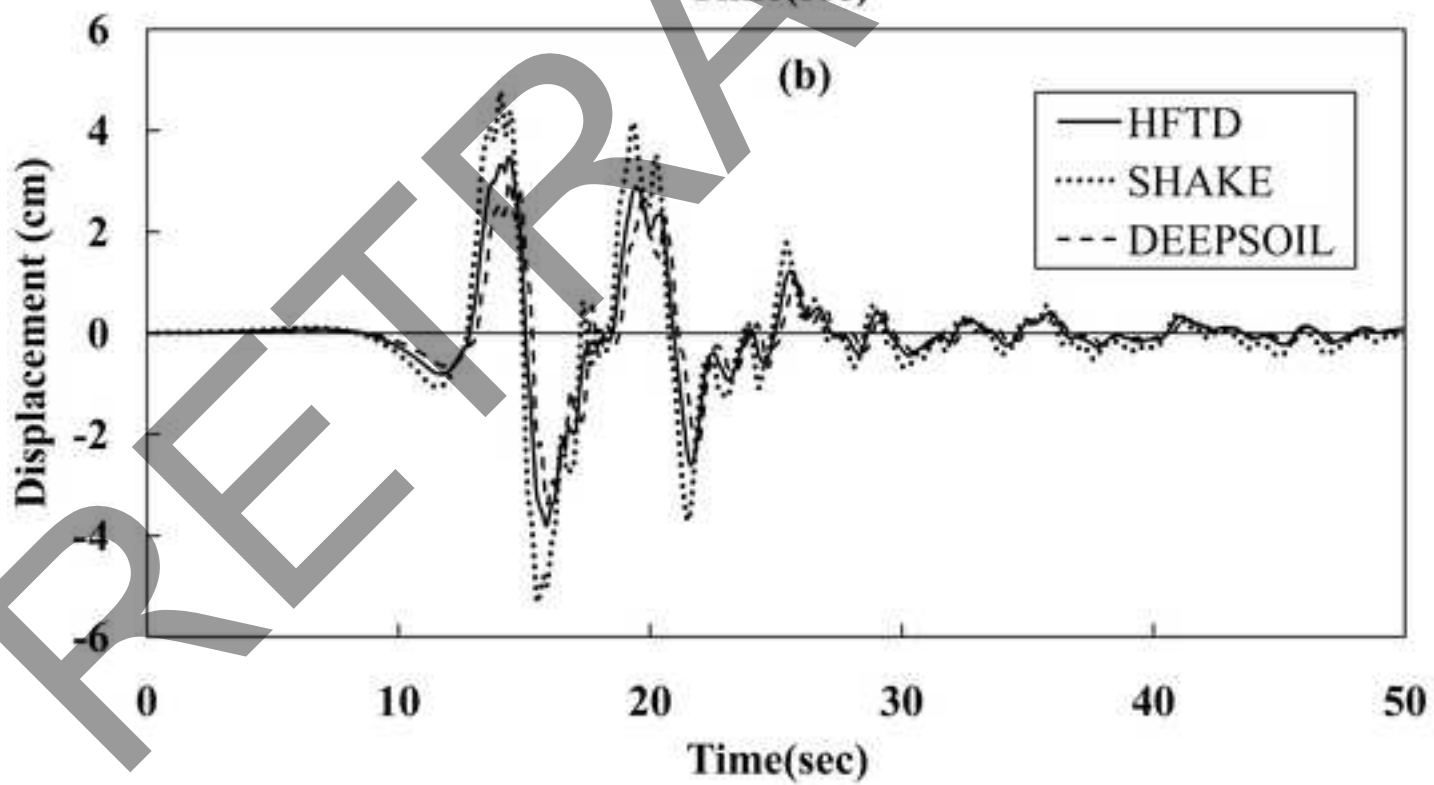

Figure 8

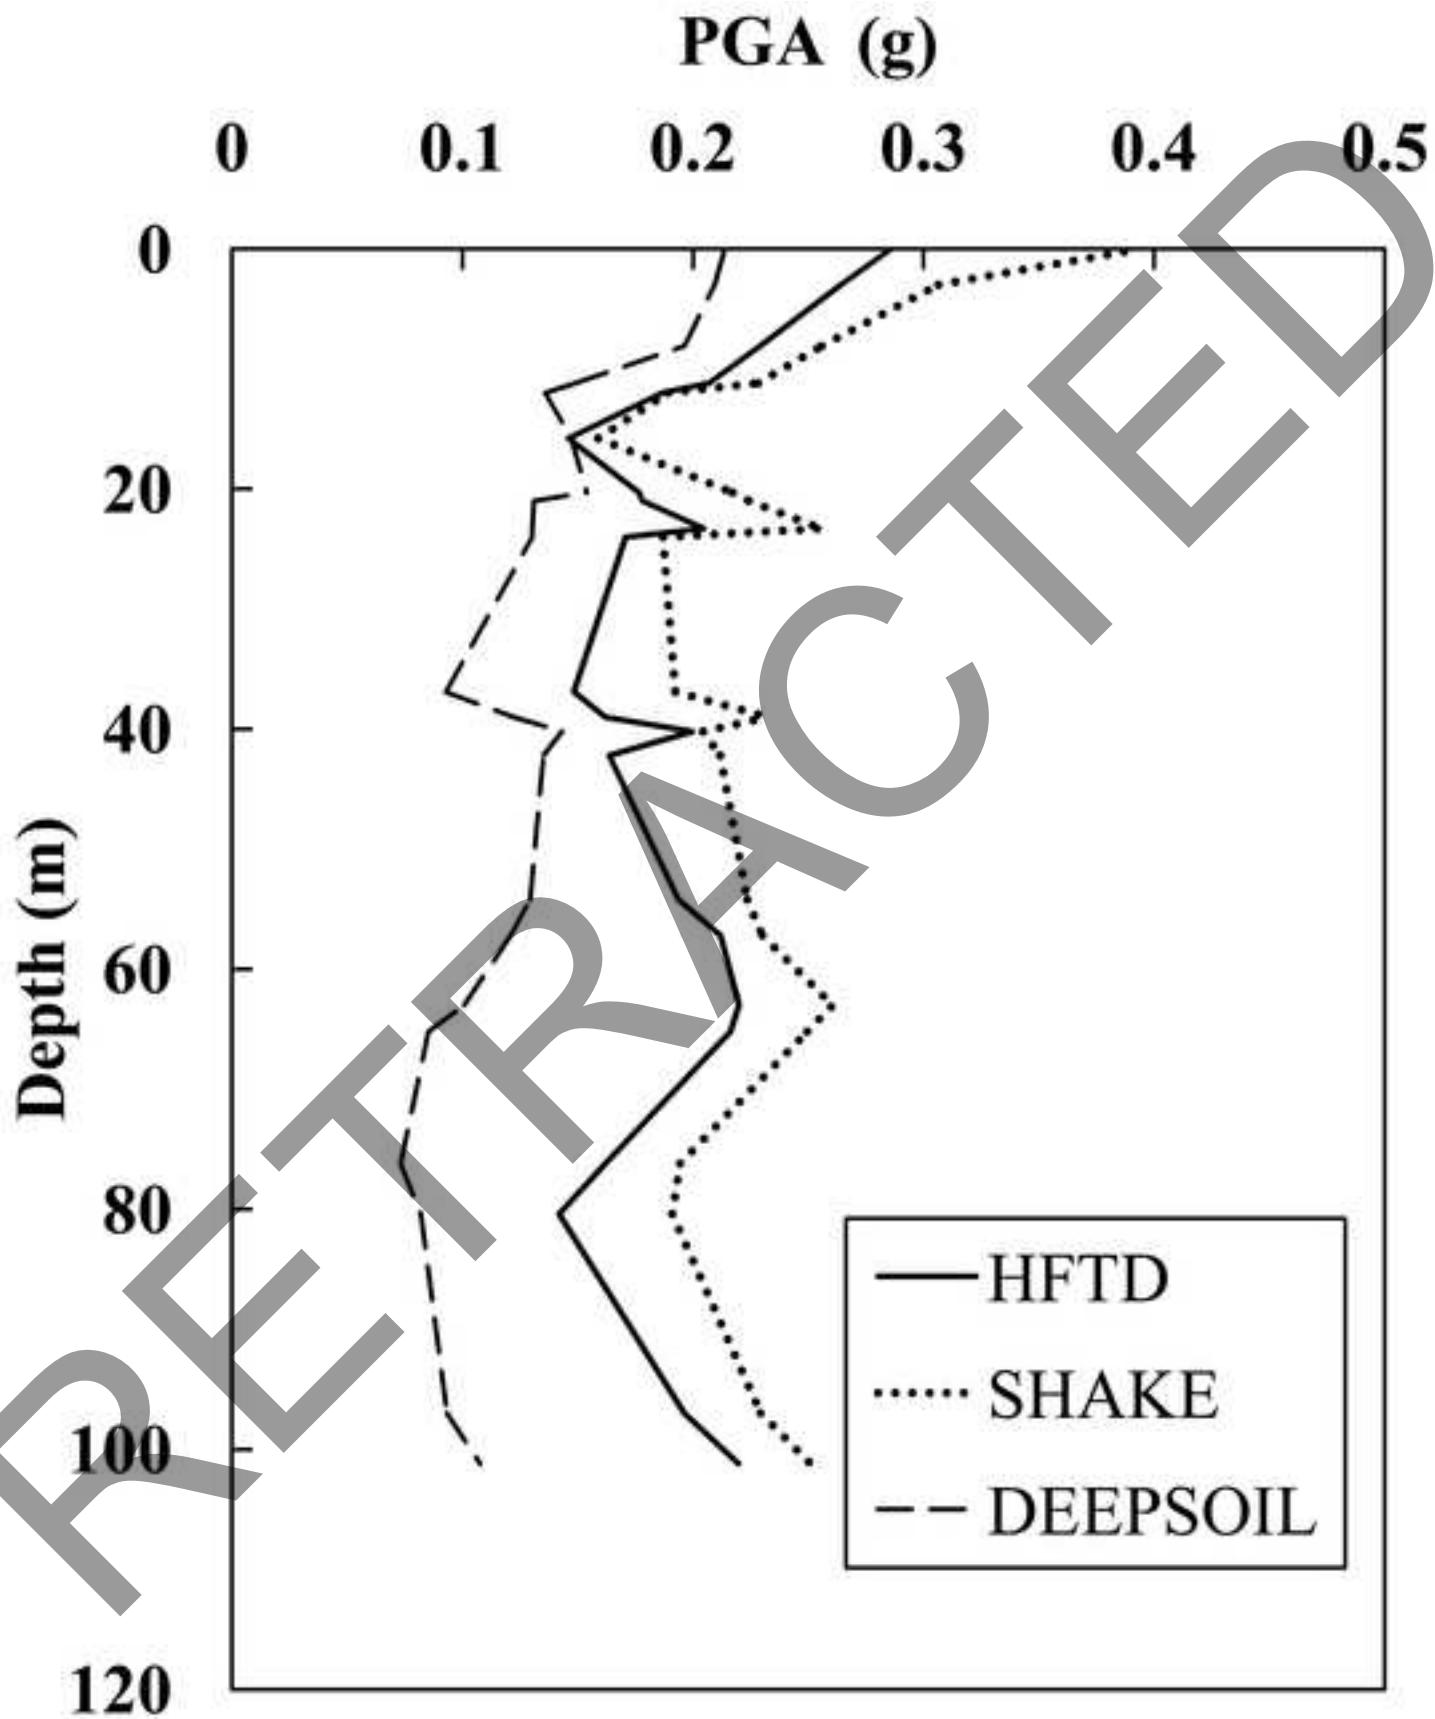

Figure 9

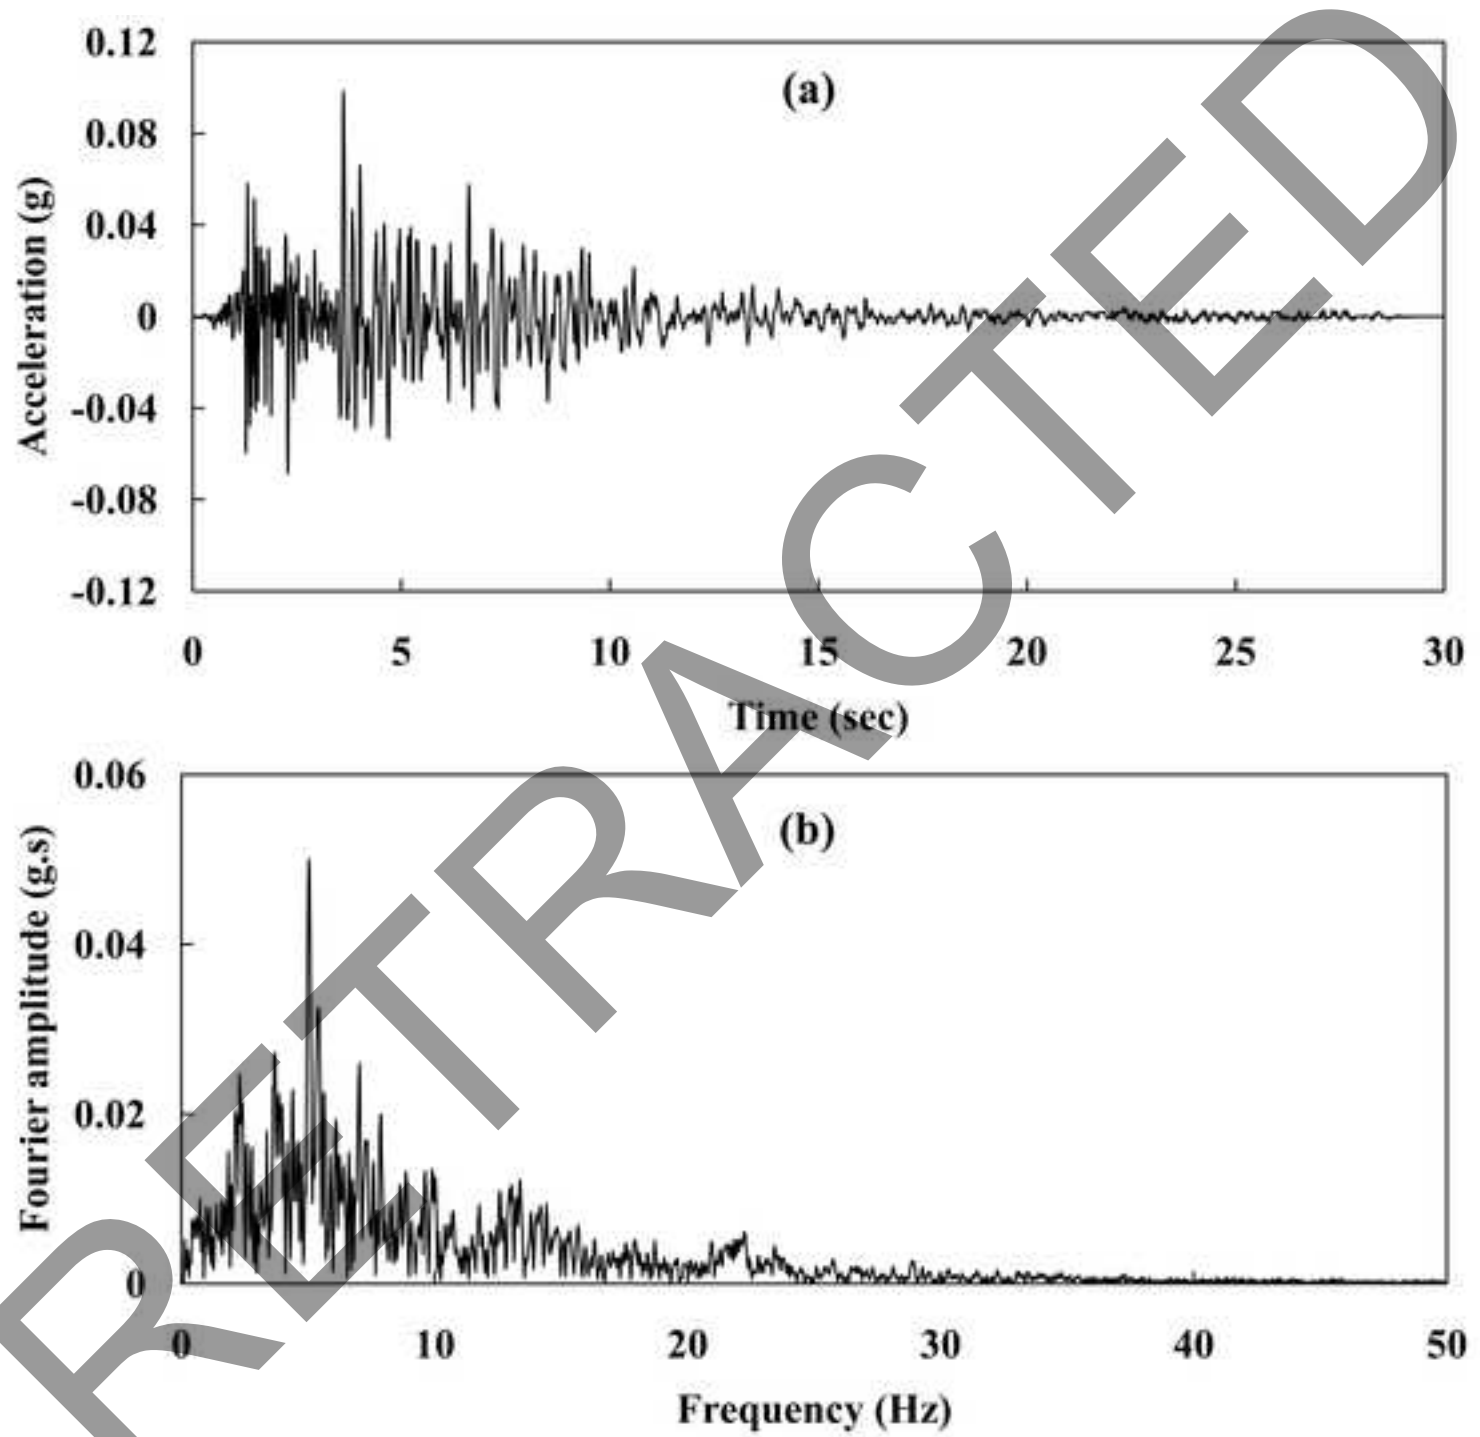

Figure 10

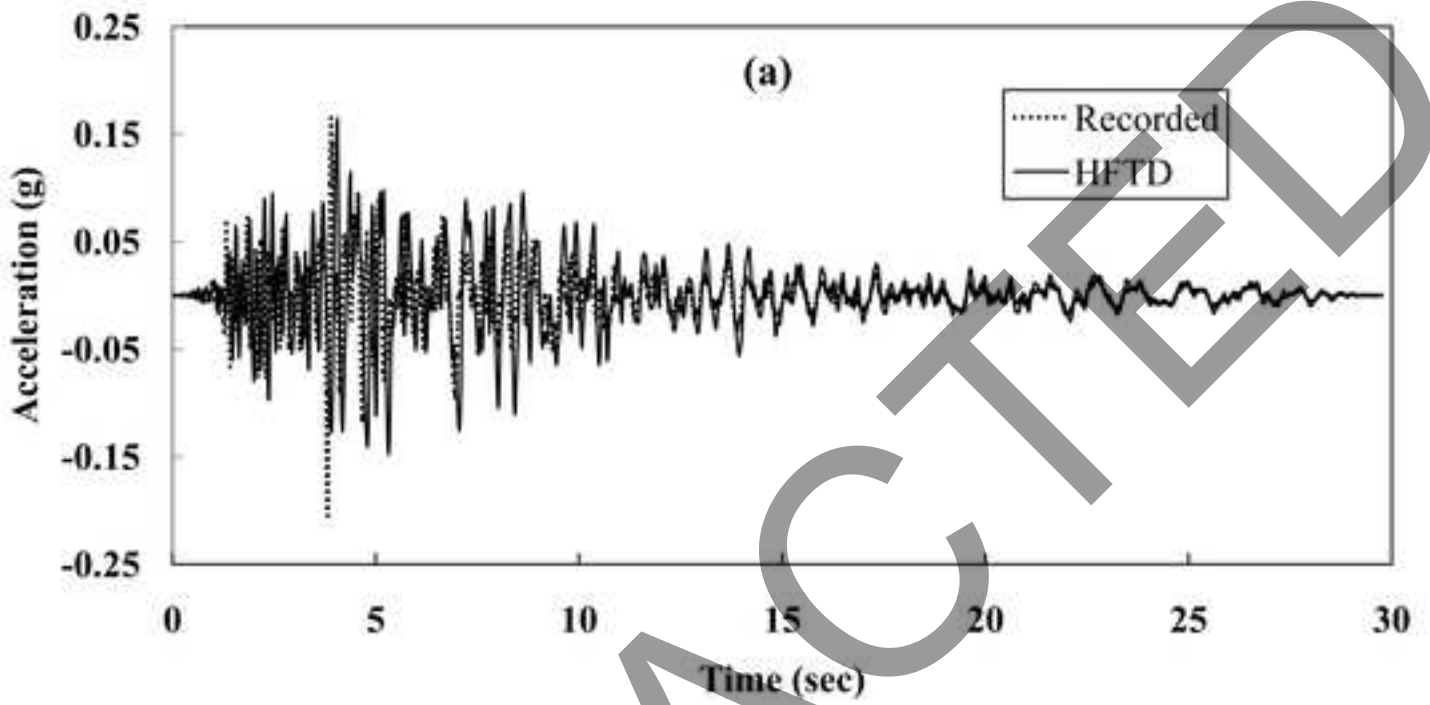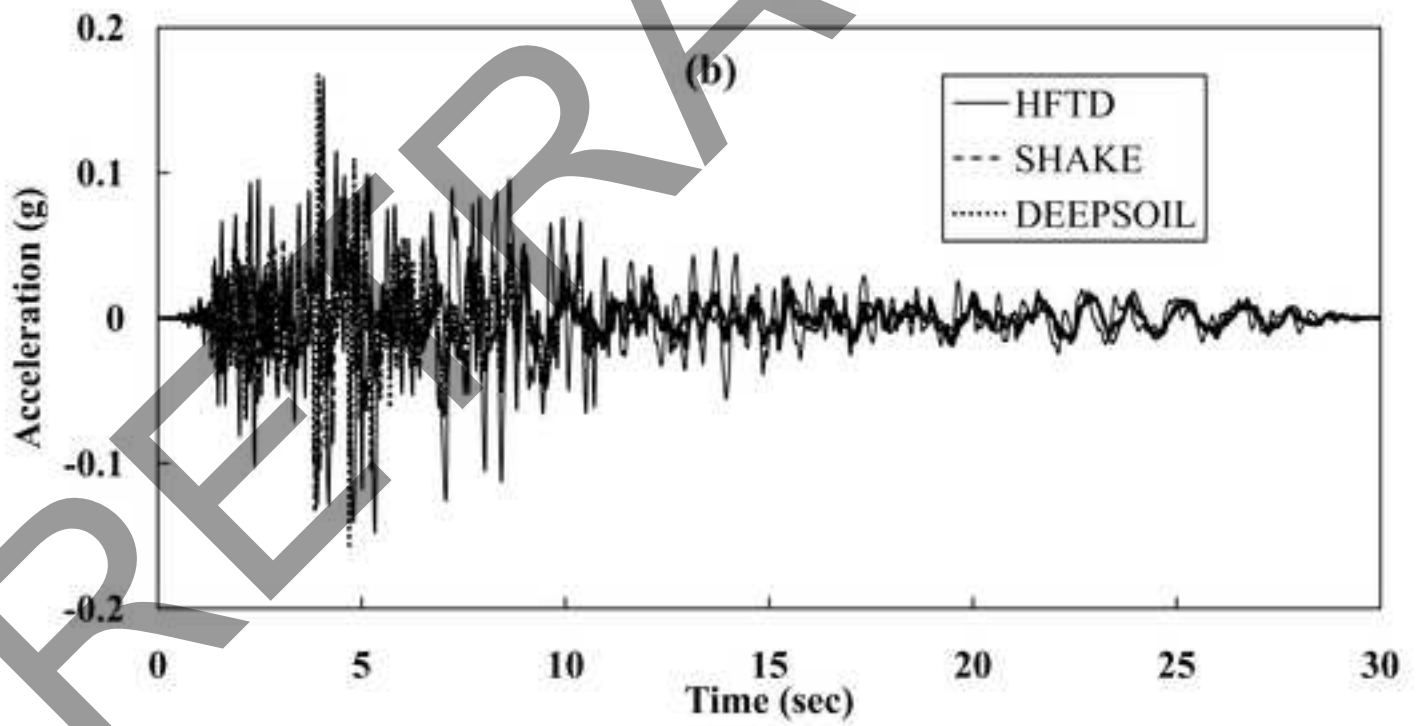



Figure 11

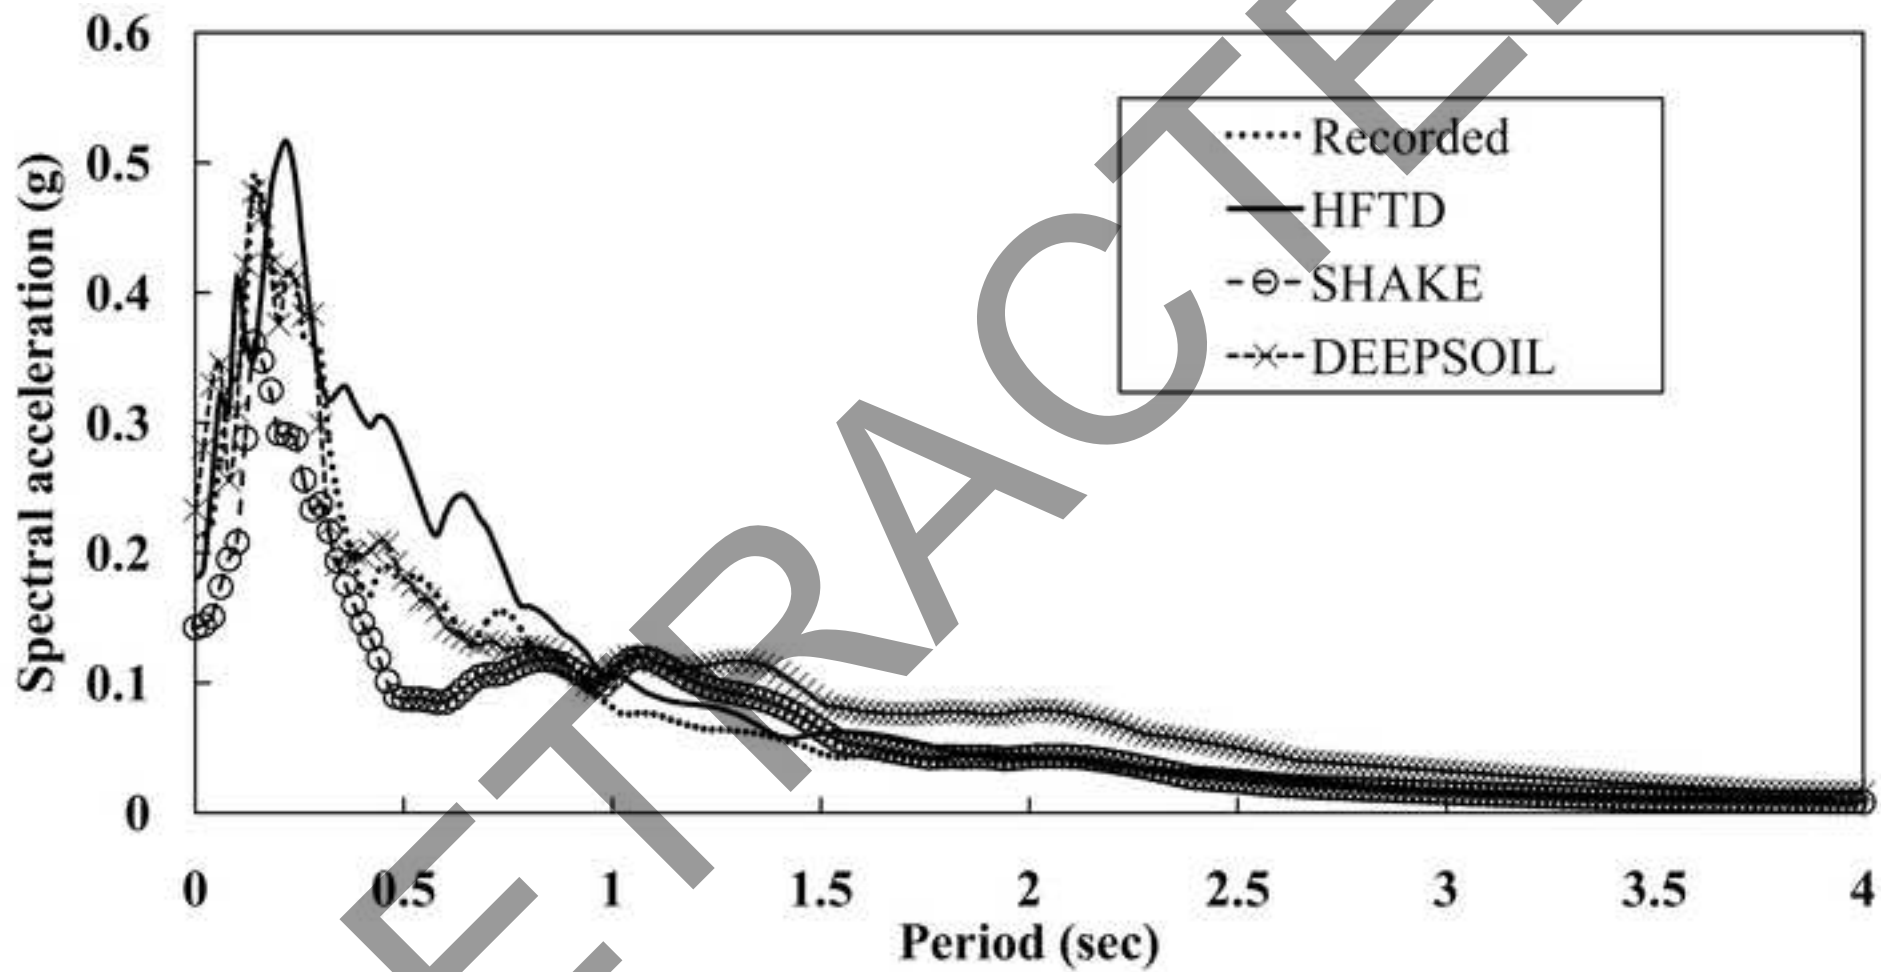

Figure 12

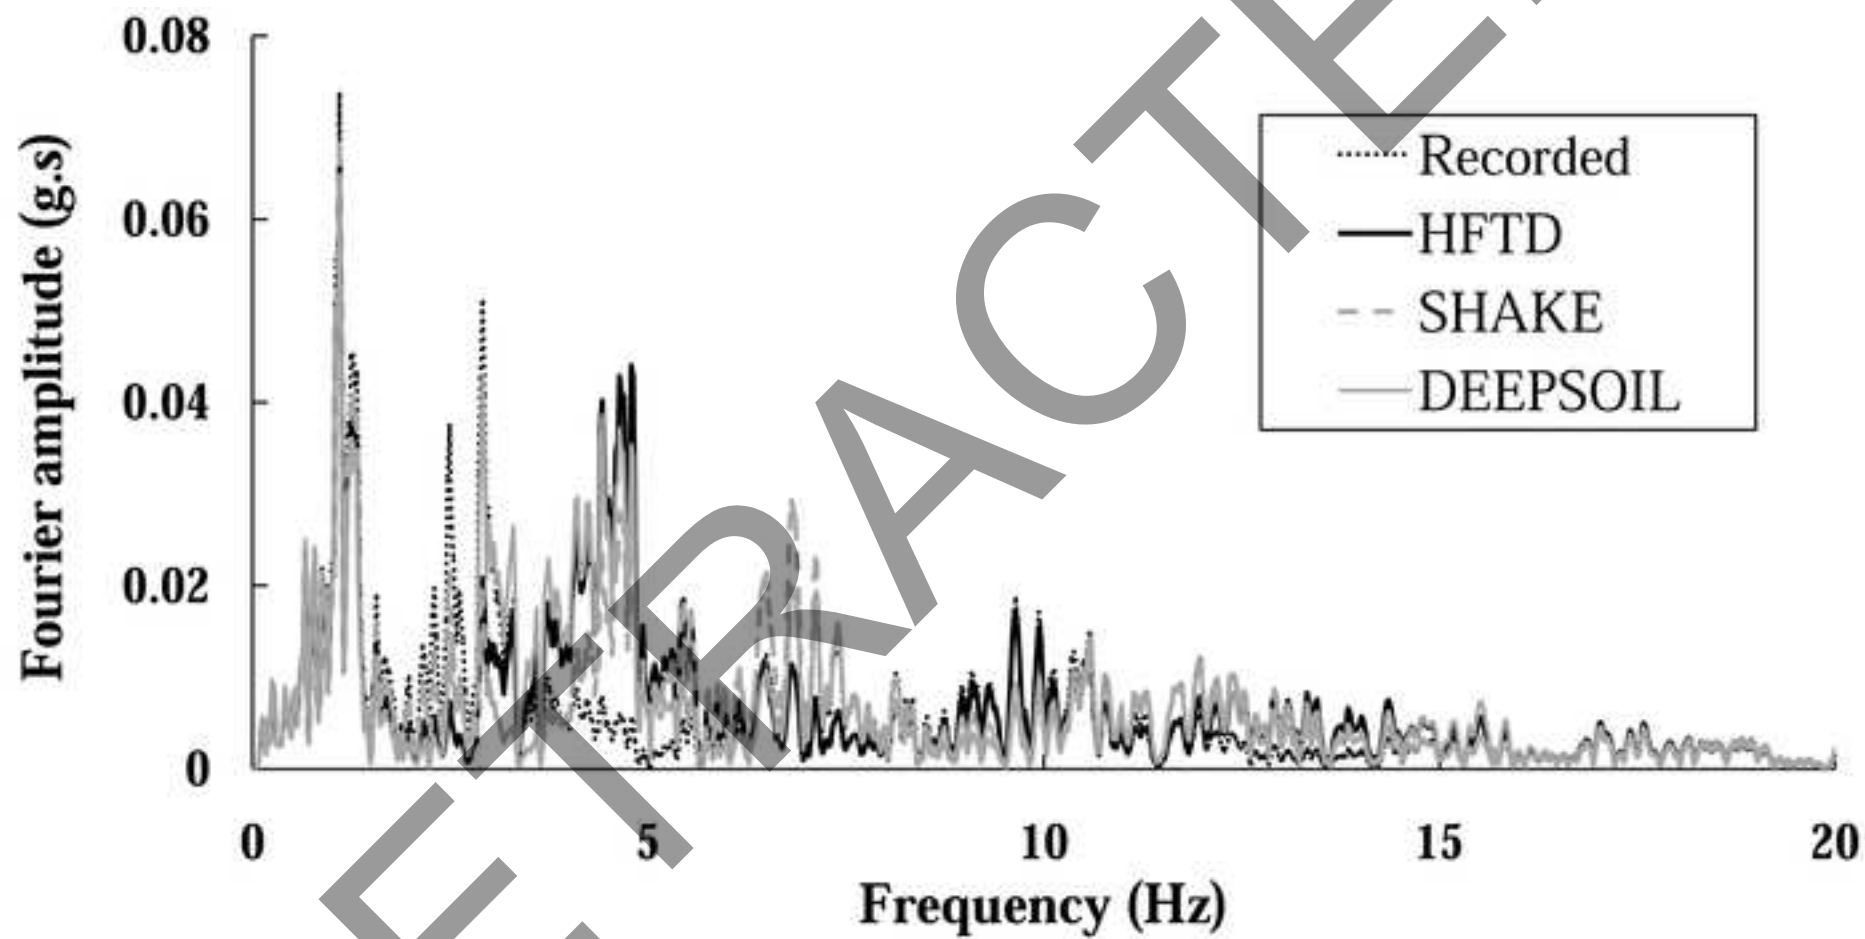

Figure 13

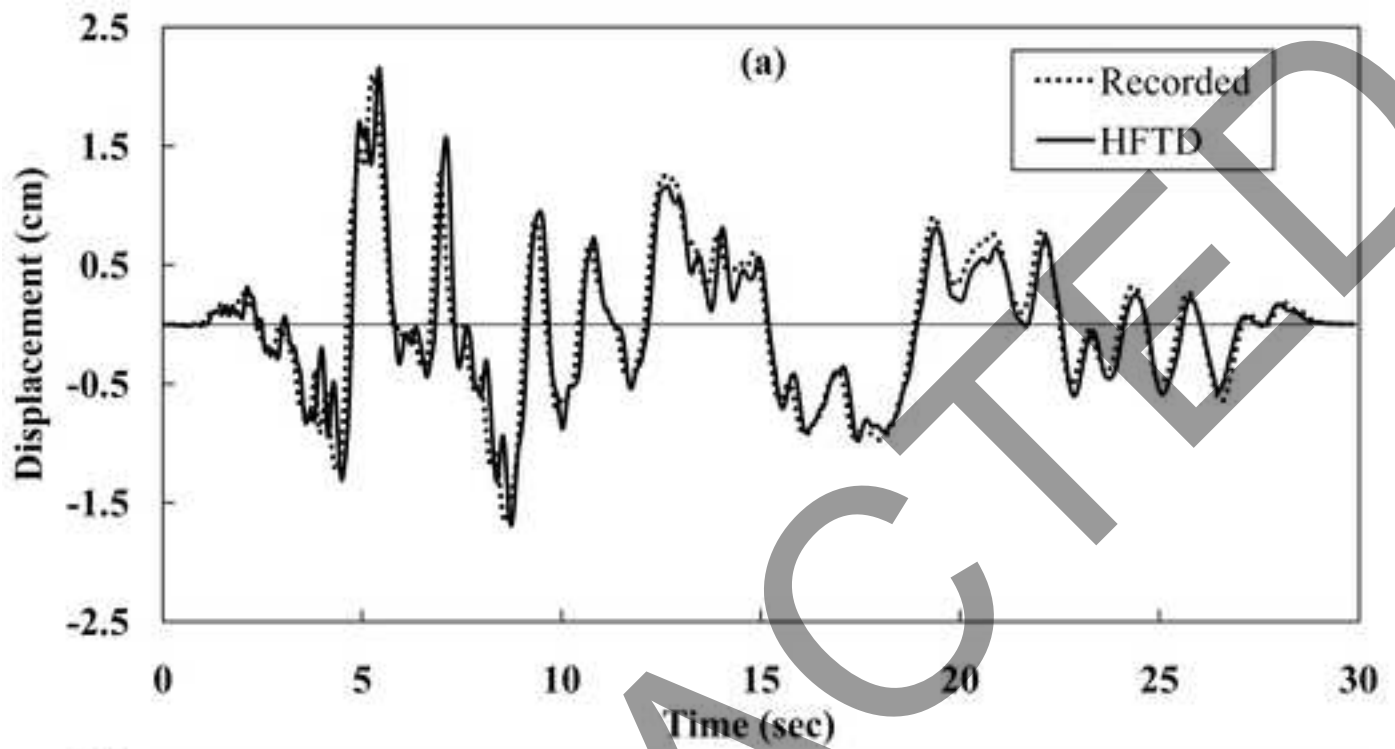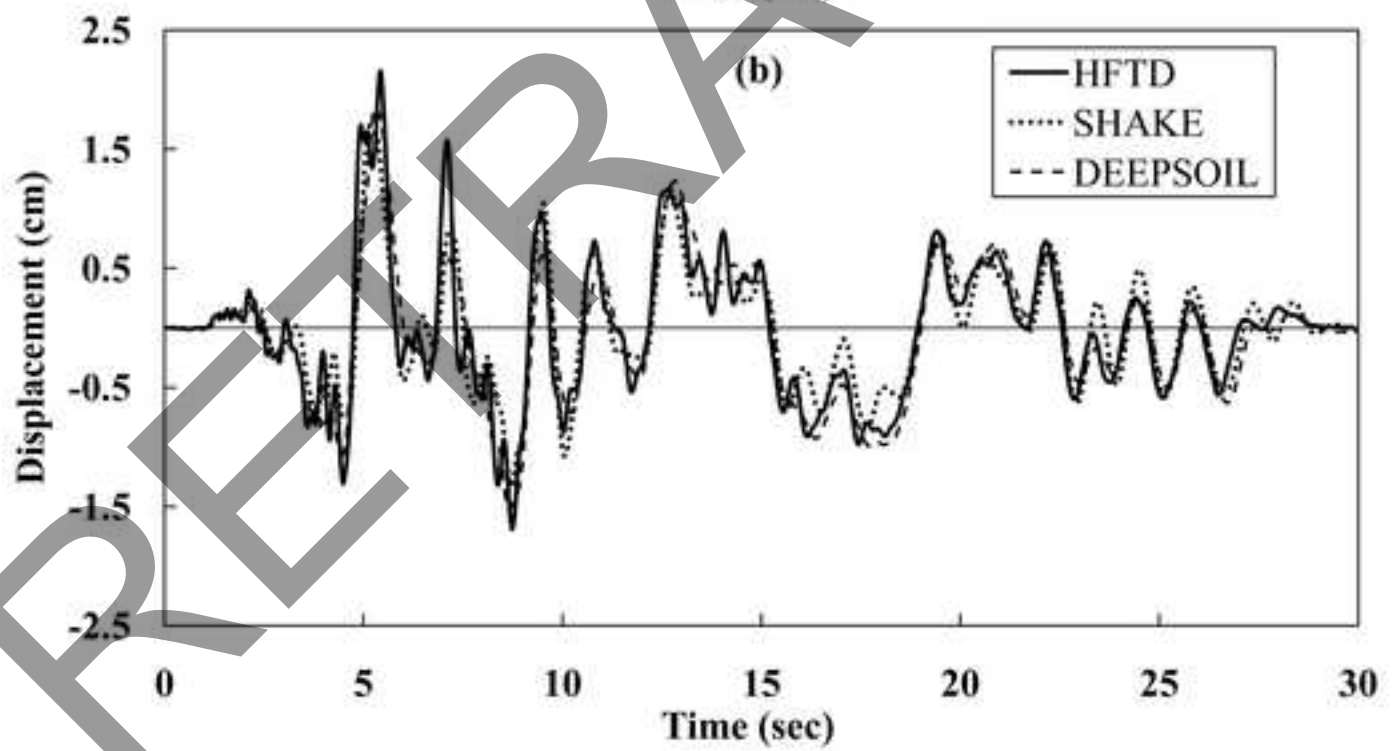

Figure 14

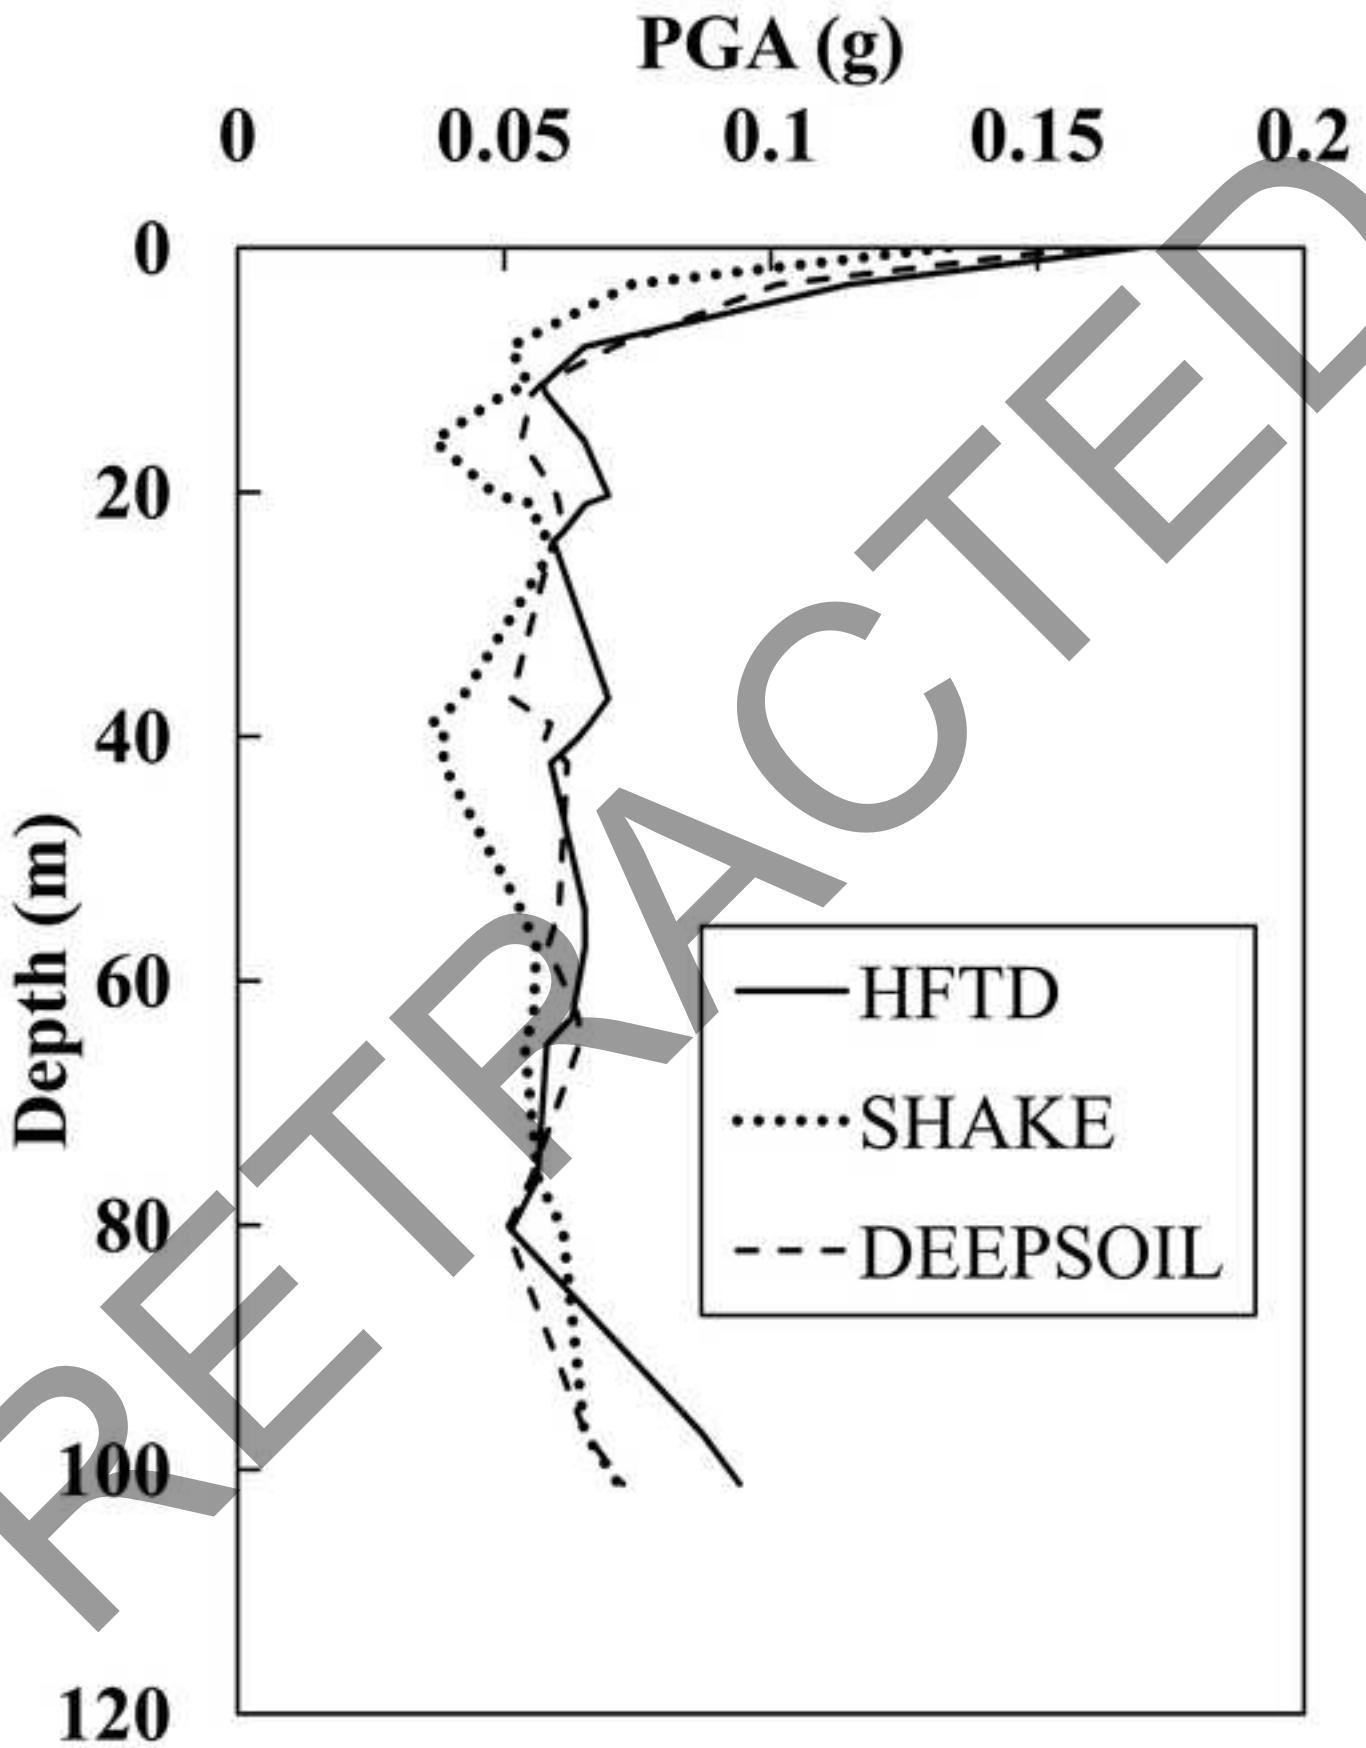

## Artwork captions

### Figures

Figure 1. (a) Horizontally stratified soil deposit; (b) lumped parameter equivalent model

Figure 2. (a) Shear modulus degradation; (b) damping ratio curves at Gilroy 2

Figure 3. (a) Acceleration time history; (b) acceleration Fourier spectrum of Loma Prieta earthquake (18/10/1989)

Figure 4. Comparison of acceleration time histories at the ground surface for the Loma Prieta earthquake obtained from HFTD method with (a) recorded data; and (b) with the results of SHAKE and DEEPSOIL computer programs

Figure 5. Acceleration Fourier amplitude of Loma Prieta earthquake on the ground surface

Figure 6. Comparison of the acceleration response spectra for the Loma Prieta earthquake ( $\xi=10\%$ )

Figure 7. Comparison of time histories of displacement at the ground surface for the Loma Prieta earthquake obtained from HFTD method with (a) recorded data; and (b) with the results of SHAKE and DEEPSOIL computer programs

Figure 8. PGA profile for Loma Prieta earthquake

Figure 9. (a) acceleration time history; (b) acceleration Fourier spectrum of Morgan Hill earthquake (24/4/1984)

Figure 10. Comparison of acceleration time histories at the ground surface for the Morgan Hill earthquake obtained from HFTD method with (a) recorded data; and (b) with the results of SHAKE and DEEPSOIL computer programs

Figure 11. Comparison of the acceleration response spectra for the Morgan Hill earthquake ( $\xi=10\%$ )

Figure 12. Acceleration Fourier amplitude of Morgan Hill earthquake on the ground surface

Figure 13. Comparison of time histories of displacement at the ground surface for the Morgan Hill earthquake obtained from HFTD method with (a) recorded data; and (b) with the results of SHAKE and DEEPSOIL computer programs

Figure 14. PGA profile for Morgan Hill earthquake

### Tables

Table 1. Summary of soil properties at Gilroy 2

Table 2. Summary of parameters for Loma Prieta earthquake

Table 3. Summary of parameters for Morgan Hill earthquake
